# Supplementary material for: Chemoproteomic discovery of a human RNA ligase
Source: PubMed Central journal article supplement (PMC9931718; doi:10.1038/s41467-023-36451-x), 2023-02-15
Supplement: 41467_2023_36451_MOESM1_ESM.pdf [file 41467_2023_36451_MOESM1_ESM.pdf]

# Chemoproteomic discovery of a human RNA ligase

## Authors

Yizhi Yuan<sup>1,2</sup>, Florian M. Stumpf<sup>1,2</sup>, Lisa A. Schlor<sup>1,2</sup>, Olivia P. Schmidt<sup>1</sup>, Philip Saumer<sup>1,2</sup>, Luisa B. Huber<sup>1,2</sup>, Matthias Frese<sup>1,2</sup>, Eva Höllmüller<sup>1,2</sup>, Martin Scheffner<sup>2,3</sup>, Florian Stengel<sup>2,3</sup>, Kay Diederichs<sup>2,3</sup>, Andreas Marx<sup>1,2\*</sup>

## Affiliations

<sup>1</sup>Department of Chemistry, University of Konstanz; Universitätsstraße 10, 78457 Konstanz, Germany.

<sup>2</sup>Konstanz Research School Chemical Biology; University of Konstanz, Universitätsstraße 10, 78457 Konstanz, Germany.

<sup>3</sup>Department of Biology, University of Konstanz; Universitätsstraße 10, 78457 Konstanz, Germany.

\*Corresponding author. Email: [andreas.marx@uni-konstanz.de](mailto:andreas.marx@uni-konstanz.de)

## Supplementary Information

## **Table of Contents**

|                               |         |
|-------------------------------|---------|
| Supplementary Figures.....    | S3-S24  |
| Supplementary Tables.....     | S25-S26 |
| Supplementary Notes.....      | S27-S28 |
| Supplementary Methods.....    | S29-S55 |
| Supplementary References..... | S56     |

## Supplementary Figures

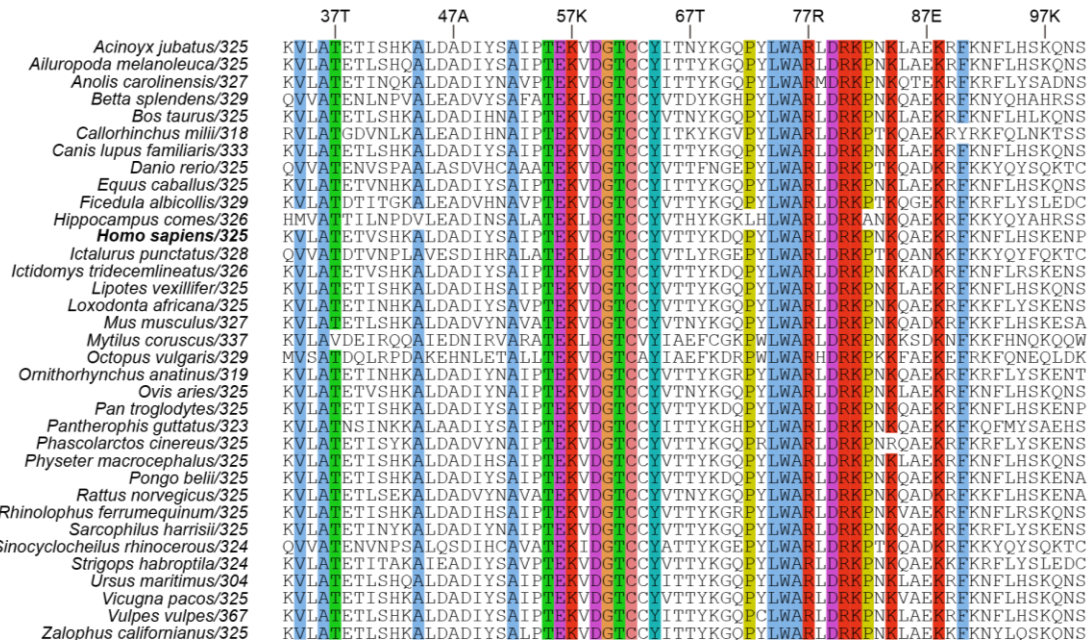

### Supplementary Fig. 1

**Multiple amino acid sequence alignment of C12orf29 homologues in different species.** The amino acid sequence of C12orf29 of *Homo sapiens* (in bold) was used as reference. The number after the species names represents the length of C12orf29 homologues. Residues with >95% identities are shaded with different colors. Hydrophobic residues are in blue. Positively charged residues are in red. Negatively charged residues are in magenta. Polar residues are in green. Cysteines are in pink. Glycines are in orange. Prolines are in yellow. Aromatic residues are in cyan. The alignment was done with Clustal Omega<sup>1</sup> (retrieved on 2021, Jan 6<sup>th</sup>) and illustrated with Jalview<sup>2</sup> (version 2.11.1.1).

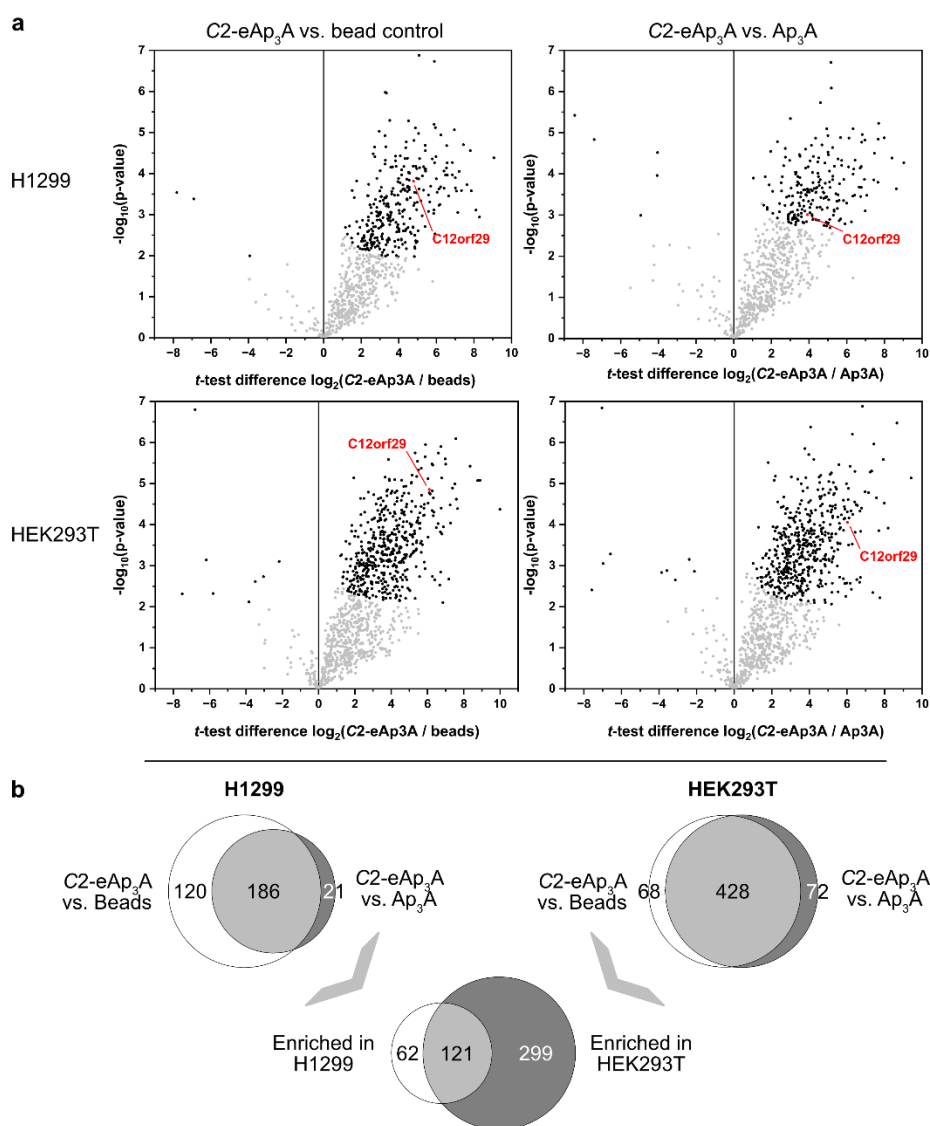

### Supplementary Fig. 2

**Results of chemical proteomics experiment. a,** Volcano plots of pairwise comparisons between C2-eAp<sub>3</sub>A and bead control as well as C2-eAp<sub>3</sub>A and Ap<sub>3</sub>A for both cell types (H1299 and HEK293T). Black circles: significantly enriched proteins ( $S_0 = 0.1$ , FDR = 0.001), red circle: C12orf29. **b,** Venn diagrams of overlap between significantly enriched proteins of both Student's *t*-tests for each cell type (top) and Venn diagram of overlap between proteins that were significantly enriched in both Student's *t*-tests for each cell type and additionally showed a *t*-test difference > 1 (bottom). C12orf29 was significantly enriched for C2-eAp<sub>3</sub>A in all pairwise comparisons in both cell types. Venn diagrams were created using eulerr.co<sup>3</sup>. Chemical proteomics mass spectrometry data are provided as Supplementary Dataset and have been deposited to the ProteomeXchange Consortium via the PRIDE partner repository with the dataset identifier PXD038132.

|          |     |                                                                                          |     |             |
|----------|-----|------------------------------------------------------------------------------------------|-----|-------------|
| C12orf29 | 1   | MKRLGSVQRKMP---C-----V----FVTEVKEEP-----SSKR-----                                        | 27  | } OB domain |
| NgrRnl   | 1   | -----SMGVRKLATIRTAGETIPIAGAEAIECCHVDGWTCVVIKKGEFKQGDRGVYFEIDSFIKEDNDRY                   | 64  |             |
| C12orf29 | 28  | ----EH-----QPFK-----VL-----                                                              | 35  | } OB domain |
| NgrRnl   | 65  | PMSKQVIDYEGQRGTRLRRTARLRGQLSQGLFLPMDRFPELASNQVGGDDVTEILGITKWEPPISTNLSGE                  | 134 |             |
| C12orf29 | 36  | -----ATETVSHKALDADIYSAIPT* <b>KVDGT</b> CCYVTTYKDPYLV* <b>ARLDRKPNKQAEKRF</b>            | 90  | } NT domain |
| NgrRnl   | 135 | ILGEFPTFISKTDQERVQNLIPQIEENKGQKFEVTV <b>KLDG</b> SSMTVYRKDDHIGV <b>CGRN</b> -----        | 192 |             |
|          |     |                                                                                          |     |             |
| C12orf29 | 91  | KNFLHSKENPKKEFFWNVEEDFKPAPECEWIPAKETEQINGNPVPDENHIGWVVPVEKNNKQYCWHSVVN                   | 160 | } NT domain |
| NgrRnl   | 193 | -----WELRETAT--NAQWHAAR                                                                  | 208 |             |
| C12orf29 | 161 | YEFEIALVLKHHPPDDSGLEISAV-PLS--D-L-LE <b>Q</b> TLE <b>L</b> IGTNINGNPYGLGSKKHPLHLIIPHG--- | 222 | } NT domain |
| NgrRnl   | 209 | -----RN-----KMIEGLQFLNRN <b>LALQGEI</b> IGESIQGNLEKLGK-----GQDFYLFDIYD                   | 253 |             |
|          |     |                                                                                          |     |             |
| C12orf29 | 223 | -----A-FQIRNL-PSLKHNLDLVSWFEDCKE--G--K <b>IEGIVWH</b> CSD-                               | 258 | } NT domain |
| NgrRnl   | 254 | IDKAQYLTPIERQSLVKQLNDNGFTVKHVPIILDLELNHTAEQILAMAD-GPSLNKNVK <b>REGLVFK</b> RLDG          | 322 |             |
|          |     |                                                                                          |     |             |
| C12orf29 | 259 | <b>GCLIKV</b> HRHHLGLCWPIPDYMNRPVIINMNLNKDSAFDIKCLFNHFLKIDNQKFVRLKDIIFDV                 | 325 | } NT domain |
| NgrRnl   | 323 | <b>KFSFKAI</b> SN-AYLEKHK-----DR-----                                                    | 340 |             |
|          |     |                                                                                          |     |             |

### Supplementary Fig. 3

**Structure-based amino acid sequence alignment of C12orf29 and NgrRnl.** The OB domain and NT domain of *NgrRnl* are indicated by brackets at right. Motifs I, I<sub>a</sub>, III, IV, and V are shaded green. Residues that are potentially essential for the ligase activity were indicated by asterisks. The alignment was done with PROMALS3D<sup>4</sup> using the C12orf29 model predicted by AlphaFold and *NgrRnl* with PDB ID: 5COT. OB, oligonucleotide-binding. NT, nucleotidyltransferase.

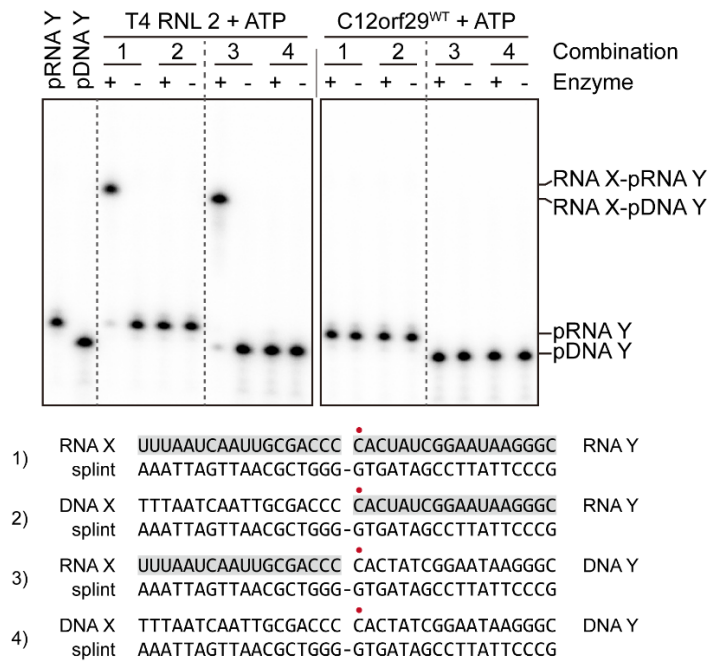

#### Supplementary Fig. 4

**Non-reactive substrates for ligation.** Four nicked duplexes with different combinations of DNA/RNA oligonucleotides were tested separately. RNA oligos were shaded in gray. The <sup>32</sup>P-labelled 5'-PO<sub>4</sub> were depicted in red. All reactions were performed under identical conditions: 1.0 μM C12orf29<sup>WT</sup>, 0.1 μM 5' <sup>32</sup>P-labelled oligonucleotide, 200 μM ATP, 5.0 mM MgCl<sub>2</sub>, and 1.0 mM DTT in 50 mM Tris-HOAc at pH 7.0 for 60 min at 37 °C. T4 RNA ligase 2 was employed for the positive controls. The radioactive oligonucleotides were resolved by urea-PAGE and phosphorimaging (representative images of *n* = 3). Source data are provided as a Source Data file.

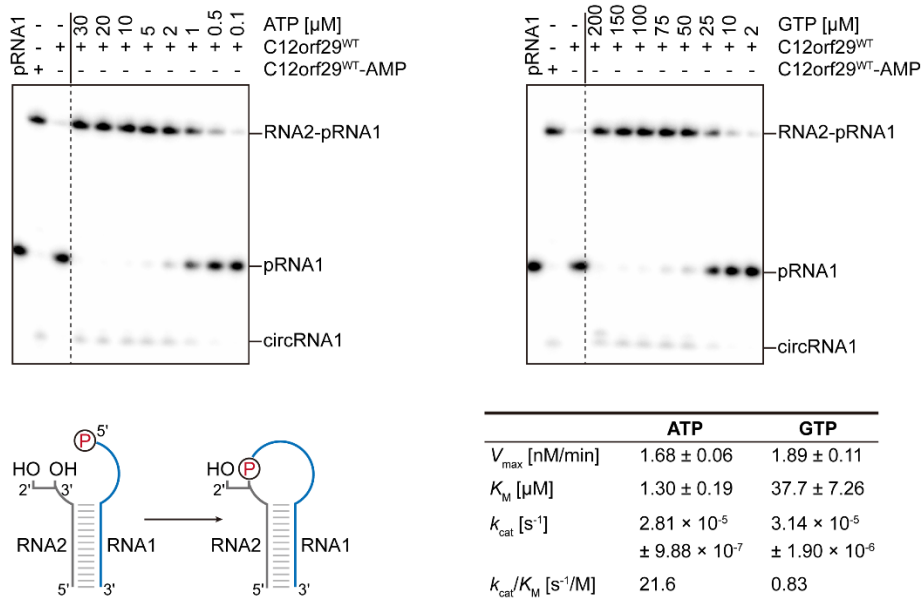

### Supplementary Fig. 5

**Steady state kinetics using ATP or GTP as substrate.** Non-cropped urea-PAGE analysis depicted in Fig. 3c were displayed in the top panel. Exemplary RNA ligation reactions depicted were performed with 1.0  $\mu$ M C12orf29<sup>WT</sup> for 60 min at 37 °C at varying concentrations of ATP or GTP. The rate of RNA2-pRNA1 formation was quantified by the intensities of the bands for each chamber. Values represented arithmetic mean  $\pm$  SD from biological triplicates. Source data are provided as a Source Data file.

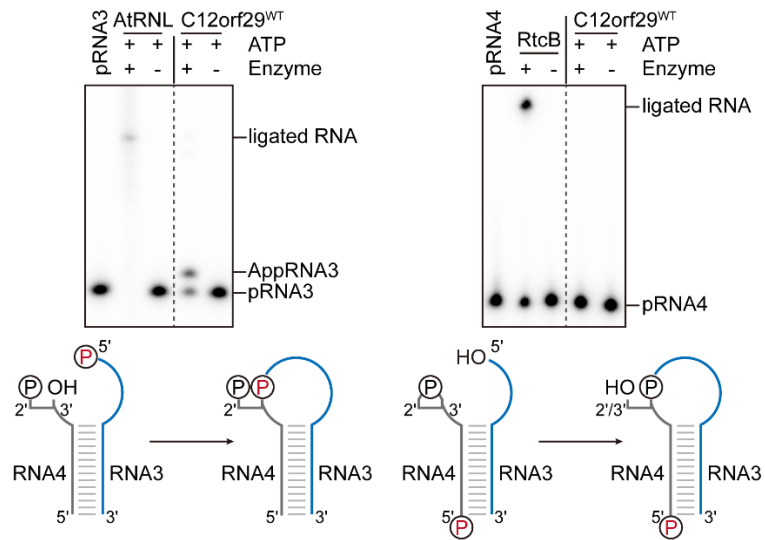

### Supplementary Fig. 6

**Substrate scope of C12orf29.** Neither RNA termini modifications (2'-PO<sub>4</sub> or 2',3'-cPO<sub>4</sub>) were not used as substrates for C12orf29. Radioactive 5'-PO<sub>4</sub> are shown in red. Representative images of  $n = 3$  biological replicates.



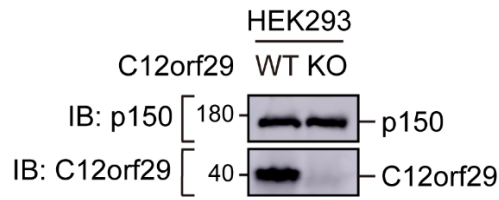

**Supplementary Fig. 7**

**Immunoblotting analysis of C12orf29 expression in WT and C12ORF29-KO HEK293 cells.** WT and C12ORF29-KO HEK293 cells were lysed in 1x loading buffer without  $\beta$ -mercaptoethanol, heated to 95 °C for 5 min and sonicated on ice. The lysates were centrifuged (12,000 x g, 5 min) and the protein concentrations of the supernatant were determined by BCA assay. 40  $\mu$ g total protein were resolved by SDS-PAGE and subsequent immunoblotting as described above (representative images of  $n = 3$ ). p150 was used as a loading control. Source data are provided as a Source Data file.

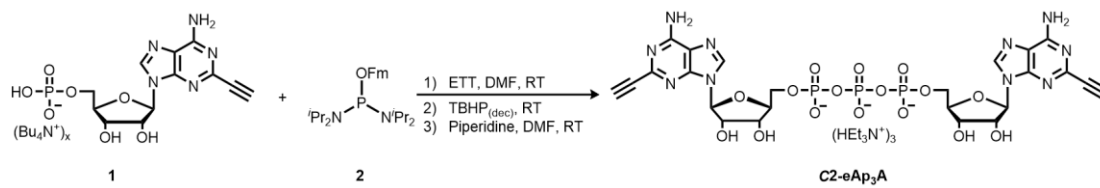

**Supplementary Fig. 8**  
**Synthesis of C2-eAp<sub>3</sub>A.**

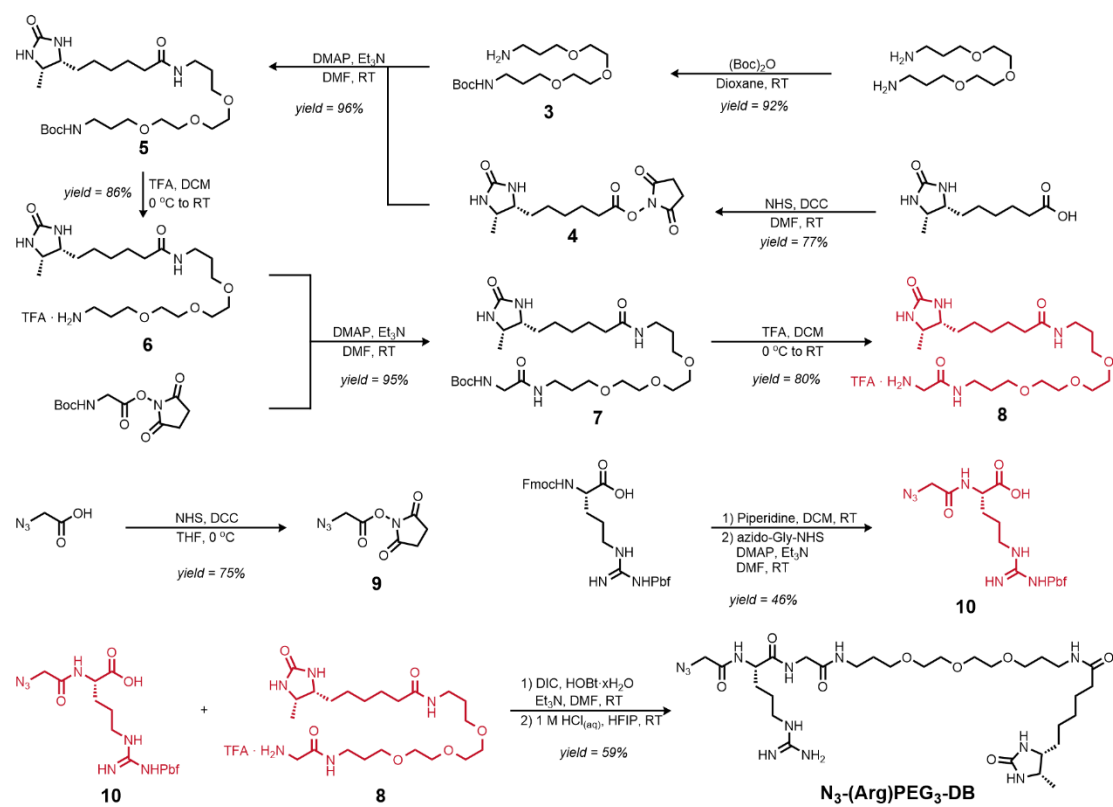

### Supplementary Fig. 9

Overview of the synthesis of  $N_3$ -(Arg)PEG<sub>3</sub>-DB. The synthesis was inspired by ref.

5.

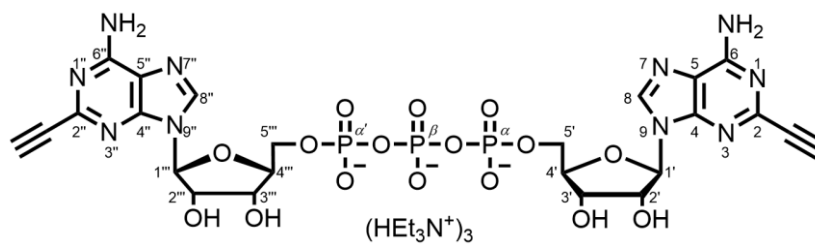

2,2''-Diethynyldiadenosine-*O*5',*O*5'''-triphosphate (triethylammonium salt form)  
**C2-eAp3A**

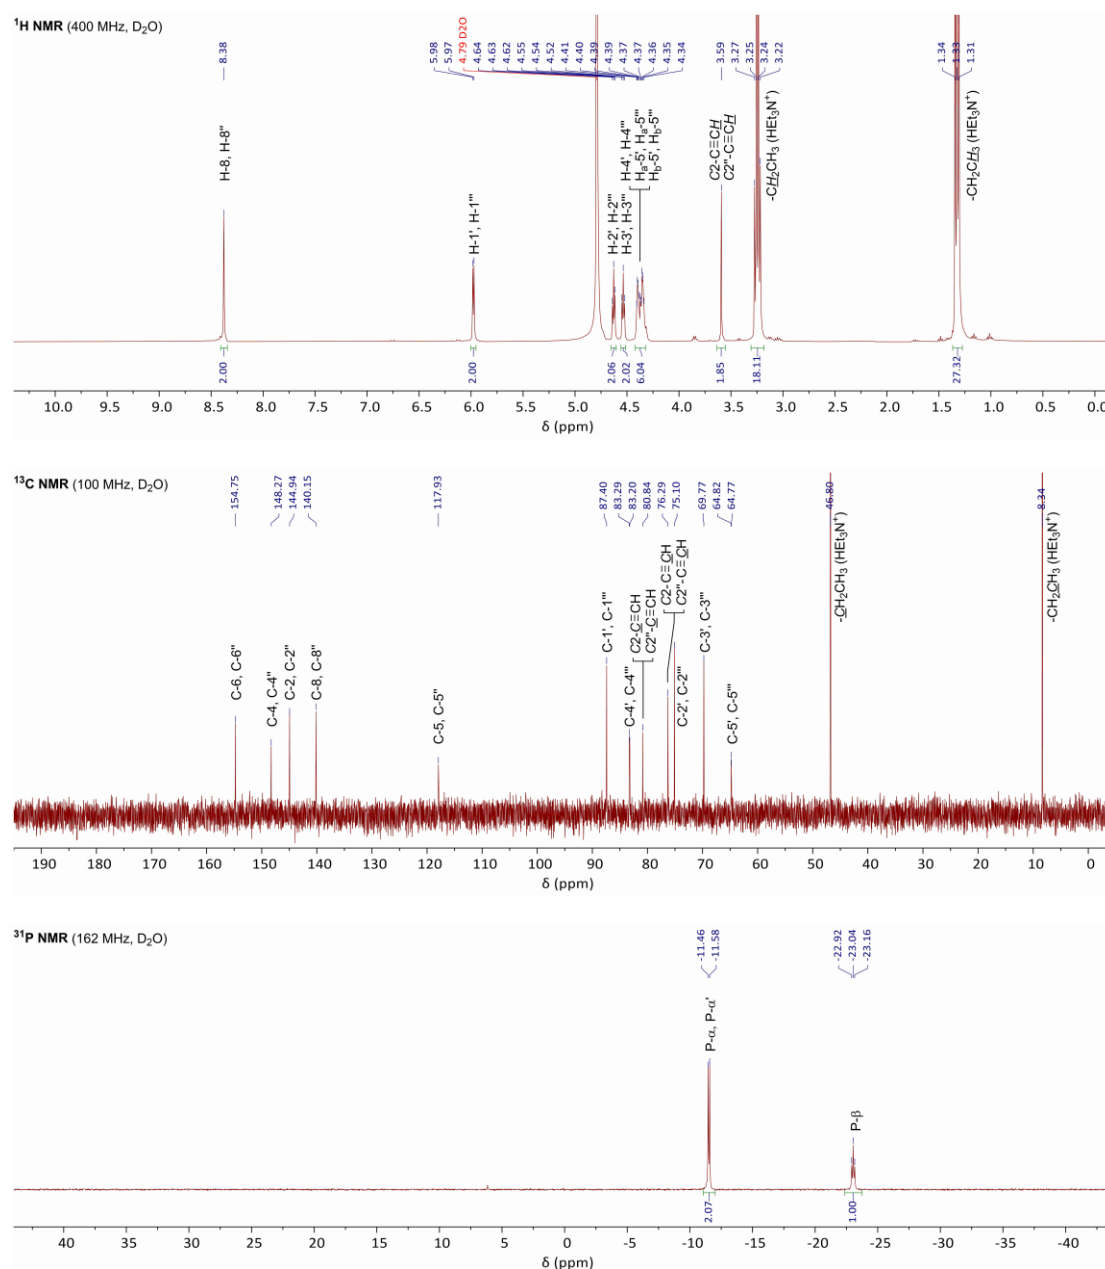

**Supplementary Fig. 10**

**NMR characterisation of 2,2''-diethynyldiadenosine-*O*5',*O*5'''-triphosphate (triethyl-ammonium salt form) C2-eAp3A.**

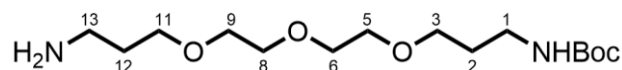

*tert*-Butyl (3-(2-(2-(3-aminopropoxy)ethoxy)ethoxy)propyl)carbamate **3**

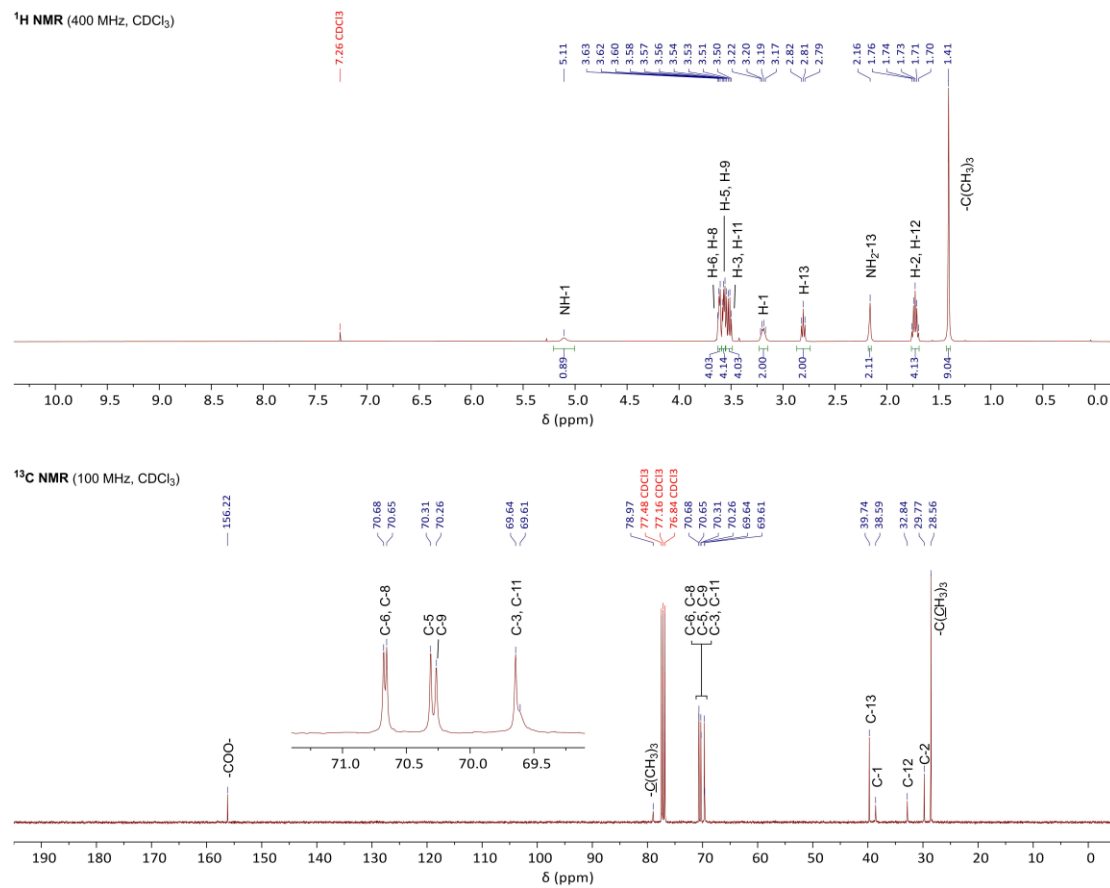

**Supplementary Fig. 11**

**NMR characterisation of *tert*-butyl (3-(2-(2-(3-aminopropoxy)ethoxy)ethoxy)-propyl)carbamate (**3**).**

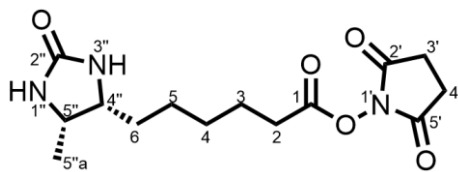

2,5-Dioxopyrrolidin-1-yl 6-((4*R*,5*S*)-5-methyl-2-oxoimidazolidin-4-yl)hexanoate **4**

<sup>1</sup>H NMR (400 MHz, DMSO-*d*<sub>6</sub>)

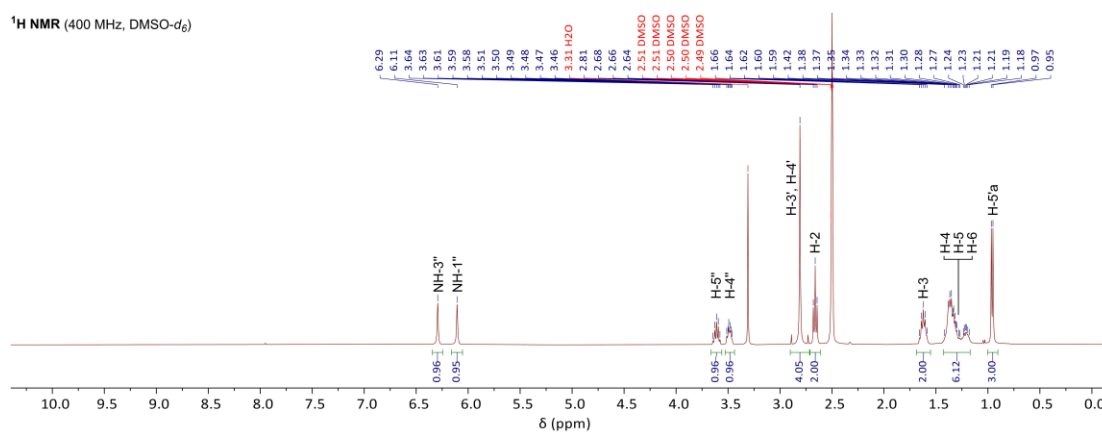

<sup>13</sup>C NMR (100 MHz, DMSO-*d*<sub>6</sub>)

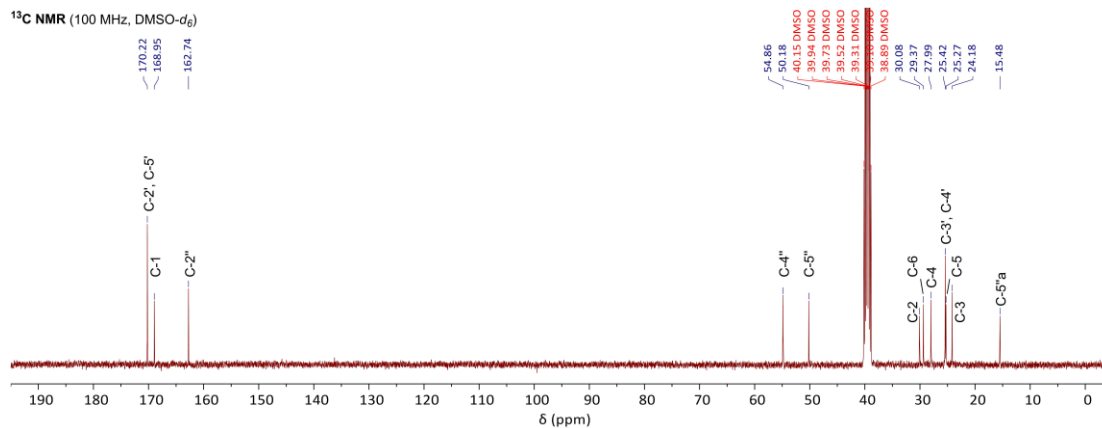

Supplementary Fig. 12

NMR characterisation of 2,5-dioxopyrrolidin-1-yl 6-((4*R*,5*S*)-5-methyl-2-oxoimidazolidin-4-yl)hexanoate (**4**).

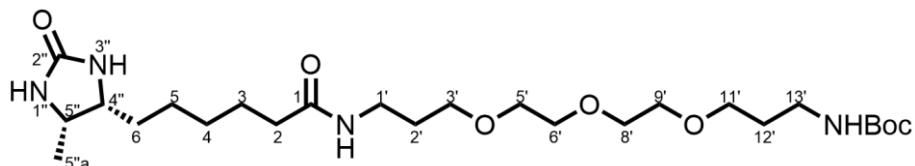

*tert*-Butyl (20-((4*R*,5*S*)-5-methyl-2-oxoimidazolidin-4-yl)-15-oxo-4,7,10-trioxa-14-azaicosyl)carbamate **5**

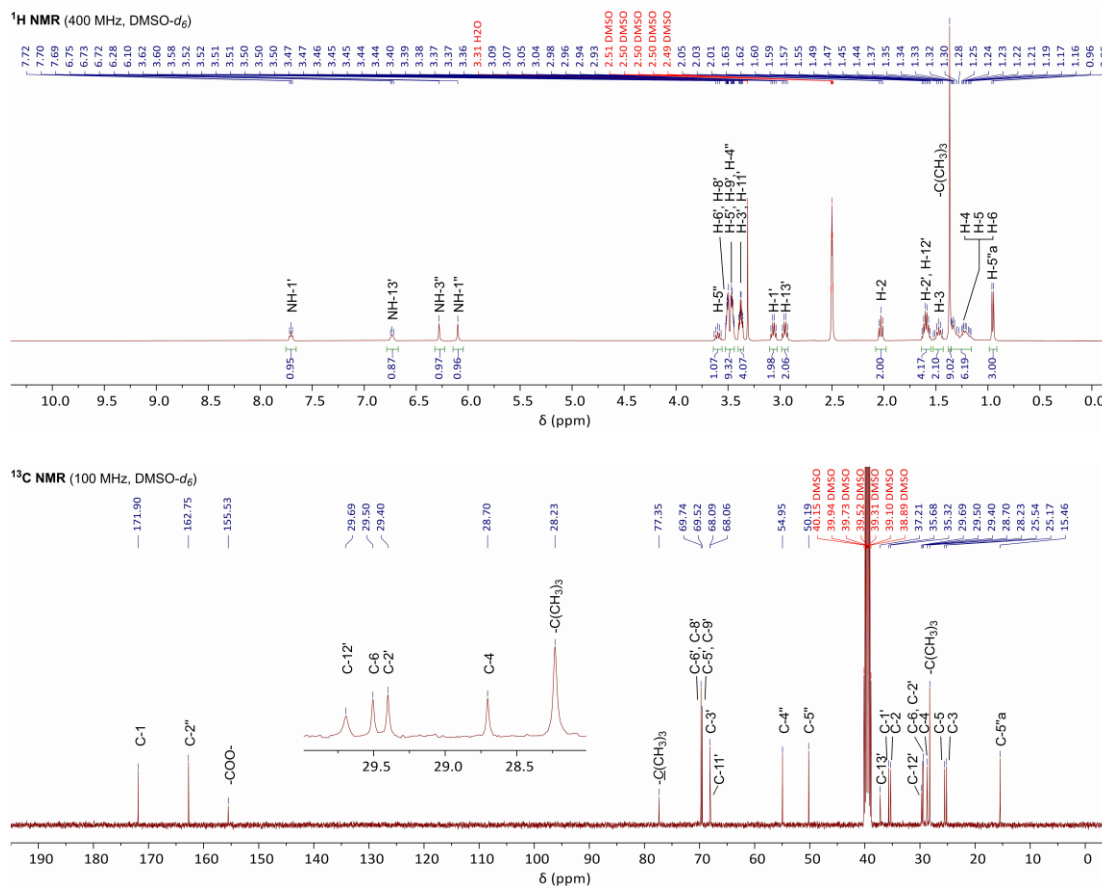

### Supplementary Fig. 13

NMR characterisation of *tert*-butyl (20-((4*R*,5*S*)-5-methyl-2-oxoimidazolidin-4-yl)-15-oxo-4,7,10-trioxa-14-azaicosyl)carbamate (**5**).







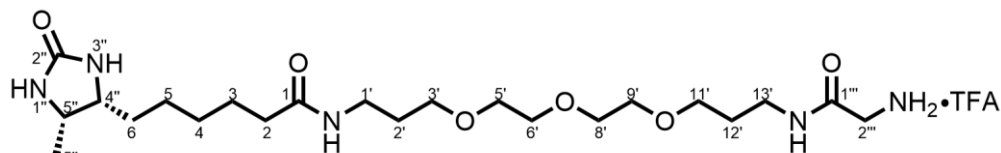

*N*-(1-Amino-2-oxo-7,10,13-trioxa-3-azahexadecan-16-yl)-6-((4*R*,5*S*)-5-methyl-2-oxoimidazolidin-4-yl)hexanamide (trifluoroacetic acid salt form) **8**

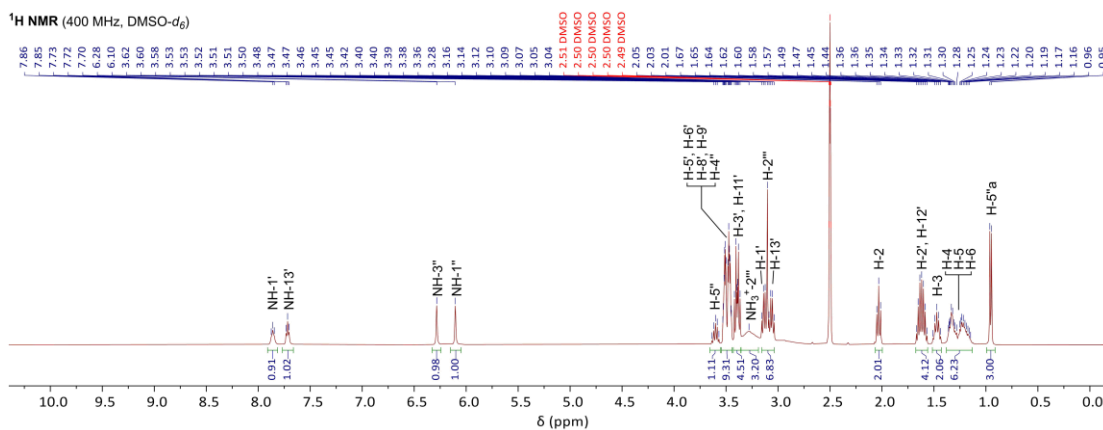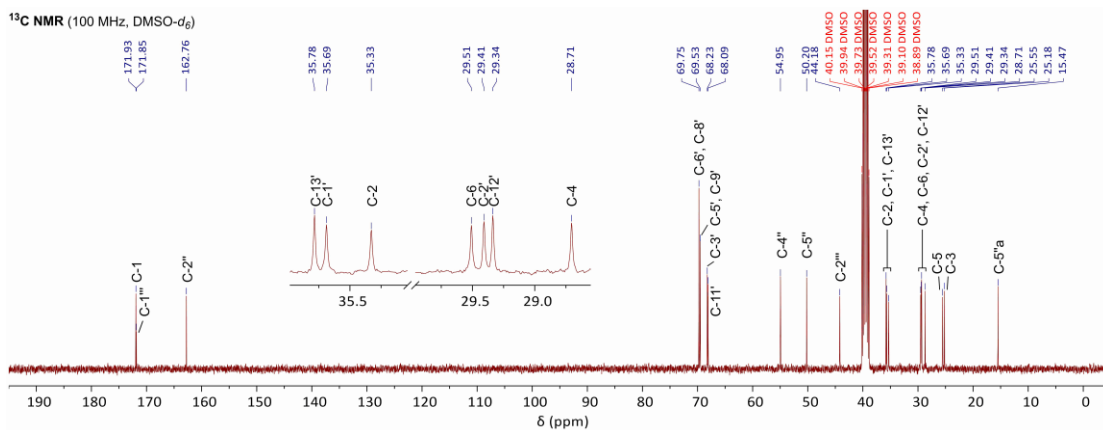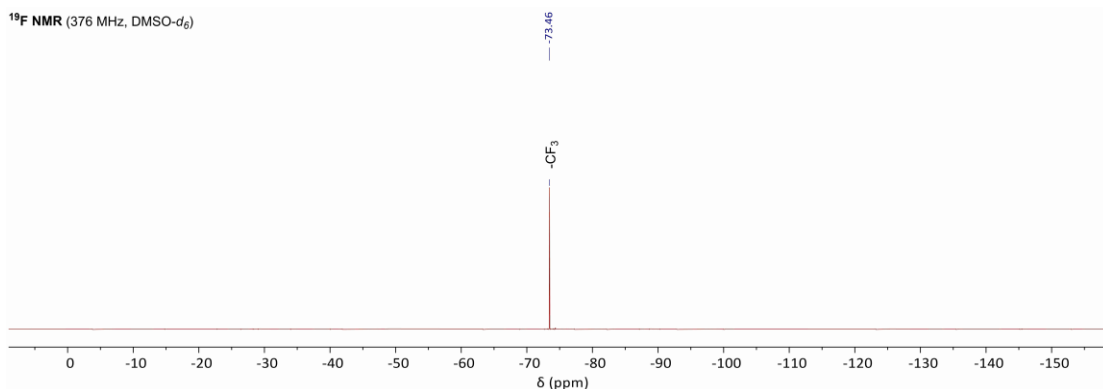

Supplementary Fig. 16

NMR characterisation of *N*-(1-amino-2-oxo-7,10,13-trioxa-3-azahexadecan-16-yl)-6-((4*R*,5*S*)-5-methyl-2-oxoimidazolidin-4-yl)hexanamide (trifluoroacetic acid salt form) (**8**).

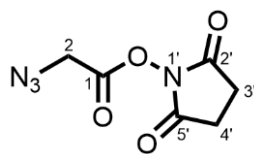

2,5-Dioxopyrrolidin-1-yl 2-azidoacetate **9**

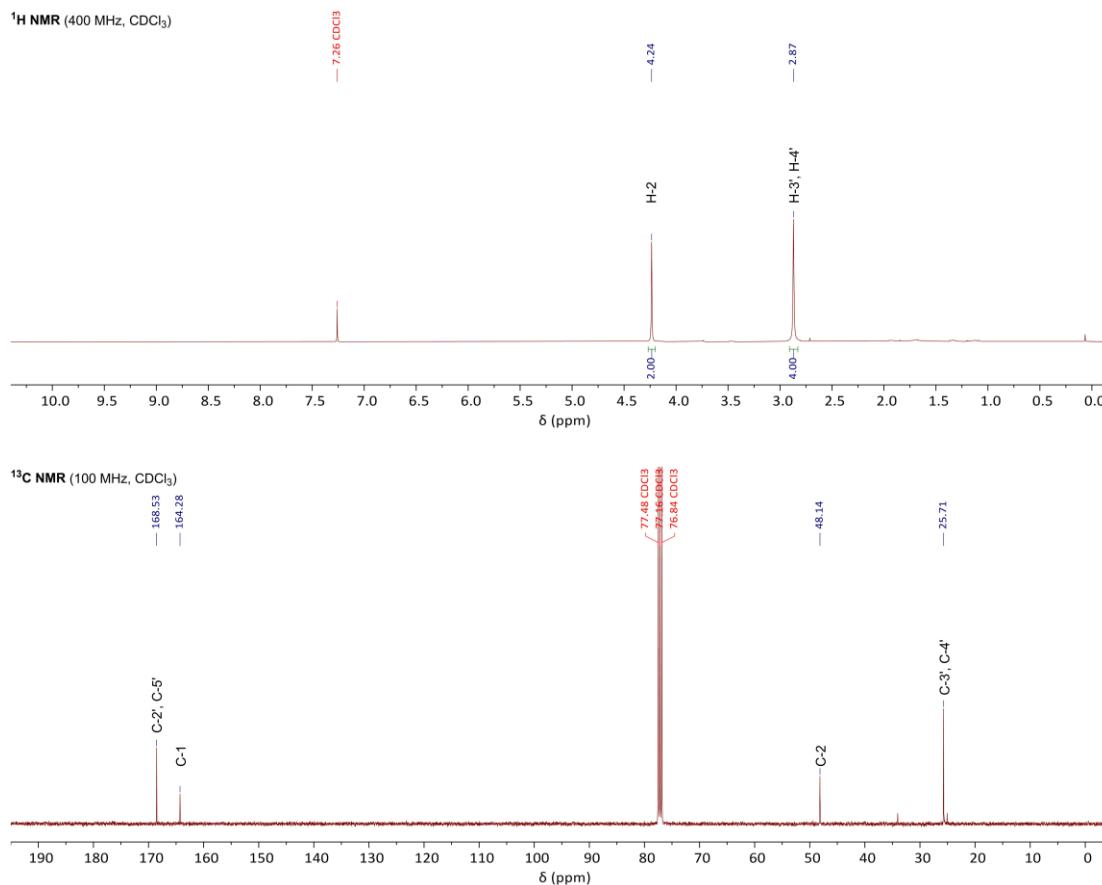

**Supplementary Fig. 17**

**NMR characterisation of 2,5-dioxopyrrolidin-1-yl 2-azidoacetate (**9**).**

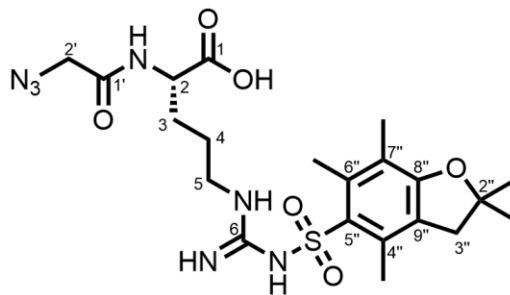

$N^2$ -(2-Azidoacetyl)- $N^0$ -((2,2,4,6,7-pentamethyl-2,3-dihydrobenzofuran-5-yl)sulfonyl)-L-arginine **10**

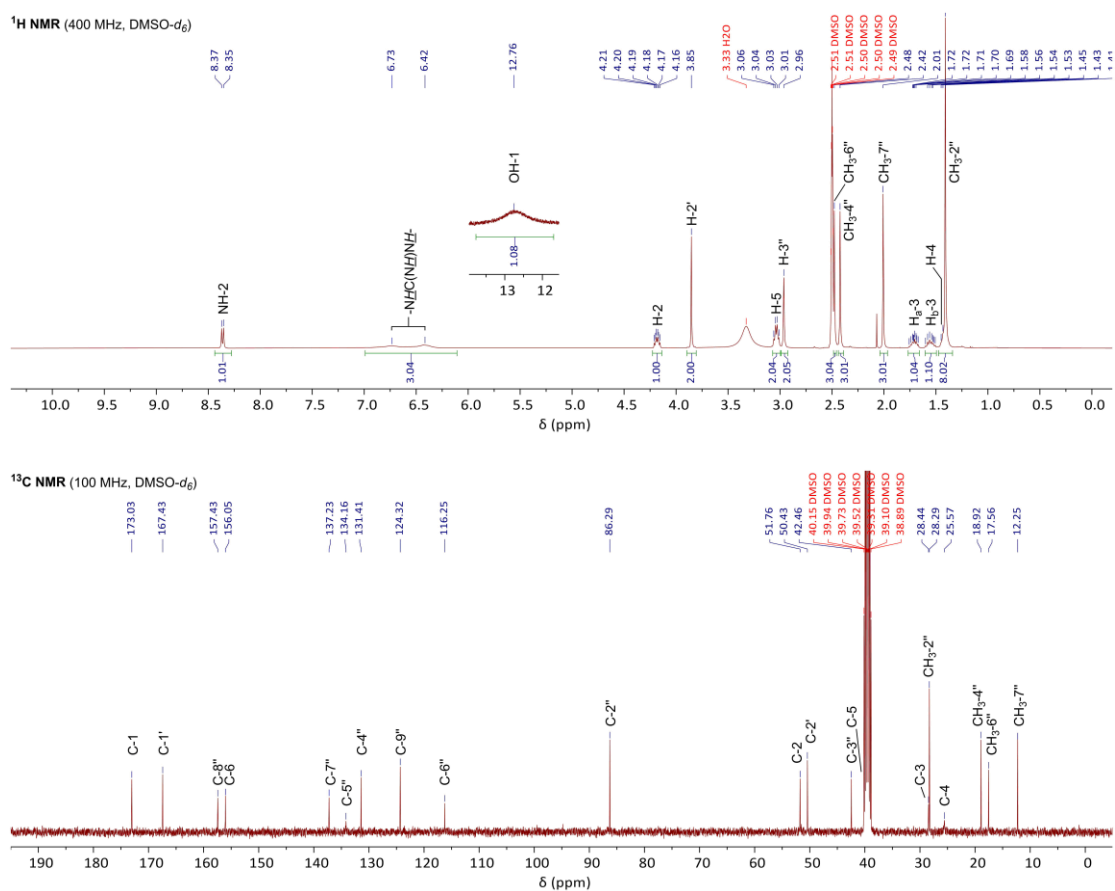

Supplementary Fig. 18

NMR characterisation of  $N^2$ -(2-azidoacetyl)- $N^0$ -((2,2,4,6,7-pentamethyl-2,3-dihydrobenzofuran-5-yl)sulfonyl)-L-arginine (**10**).

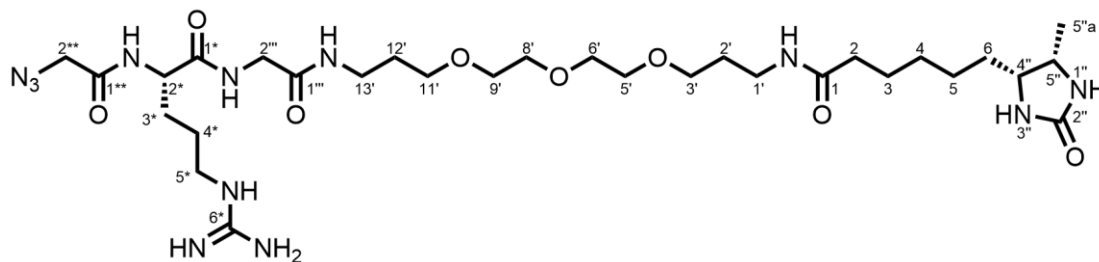

*N*-((*S*)-1-Amino-6-(2-azidoacetamido)-1-imino-7,10-dioxo-15,18,21-trioxa-2,8,11-triazatetracosan-24-yl)-6-((4*R*,5*S*)-5-methyl-2-oxoimidazolidin-4-yl)hexanamide  
**N<sub>3</sub>-(Arg)PEG<sub>3</sub>-DB**

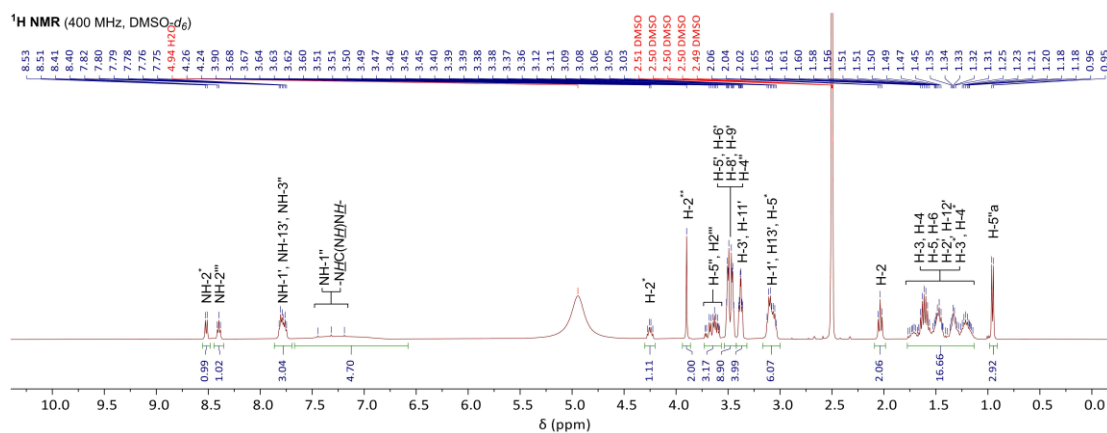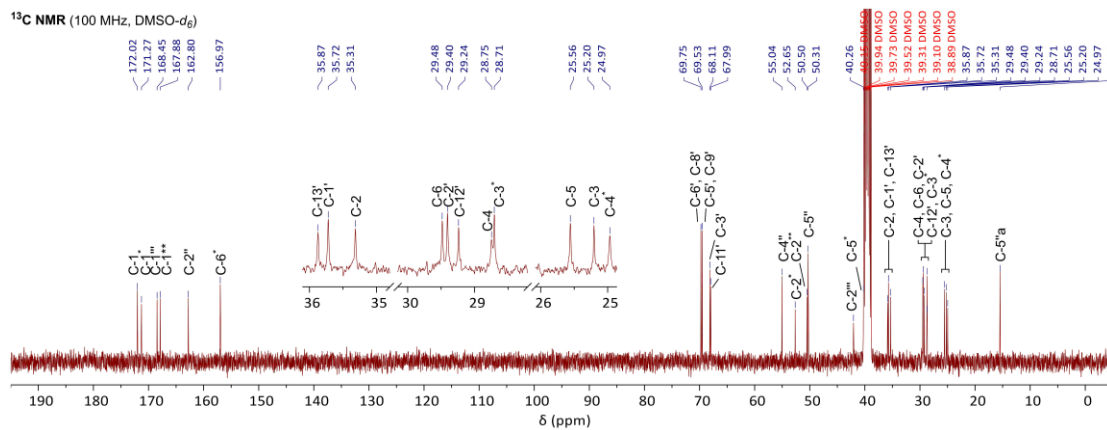

**Supplementary Fig. 19**

**NMR characterisation of *N*-((*S*)-1-amino-6-(2-azidoacetamido)-1-imino-7,10-dioxo-15,18,21-trioxa-2,8,11-triazatetracosan-24-yl)-6-((4*R*,5*S*)-5-methyl-2-oxoimidazolidin-4-yl)hexanamide N<sub>3</sub>-(Arg)PEG<sub>3</sub>-DB.**

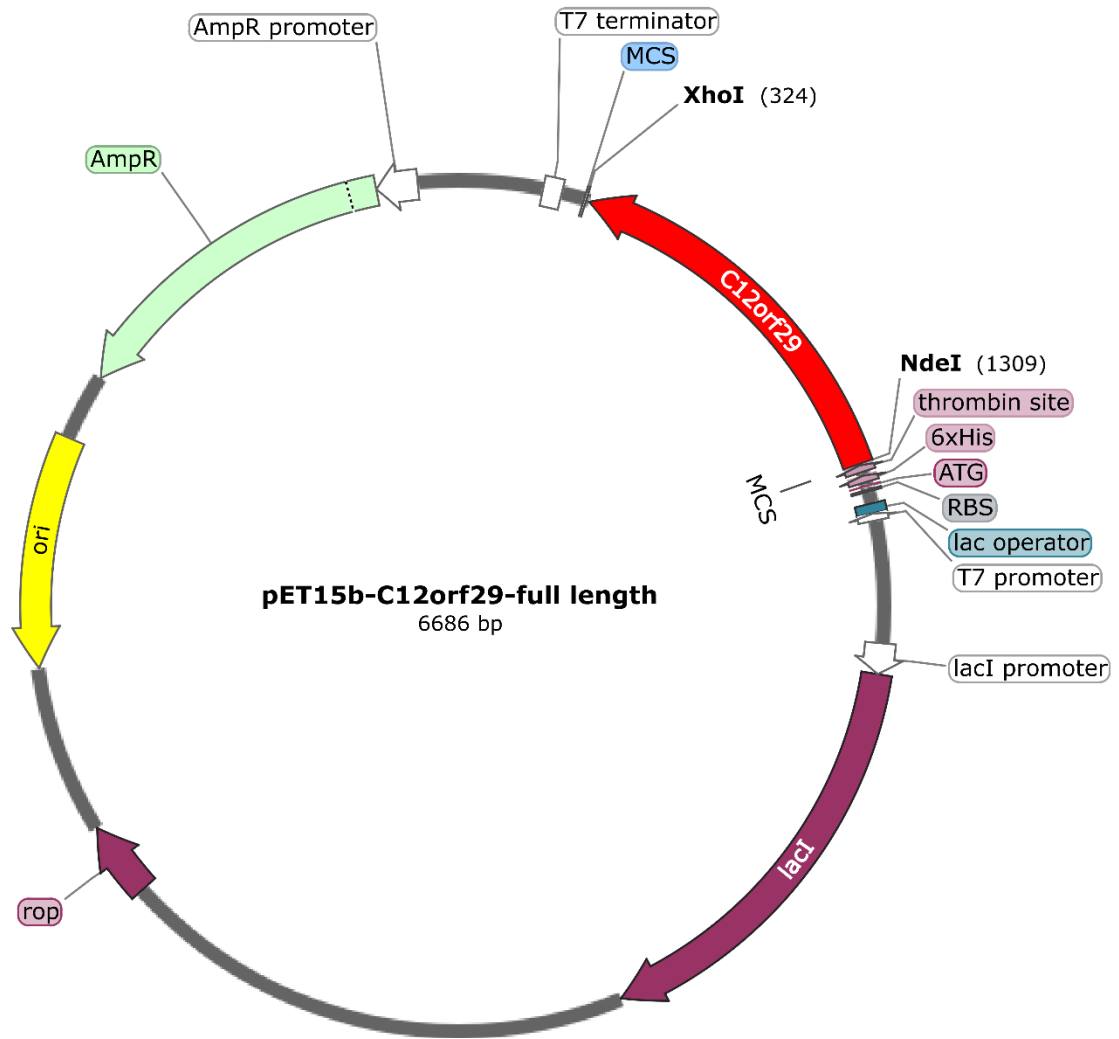

Supplementary Fig. 20  
 Plasmid map of pET15b-C12orf29<sup>WT</sup>.

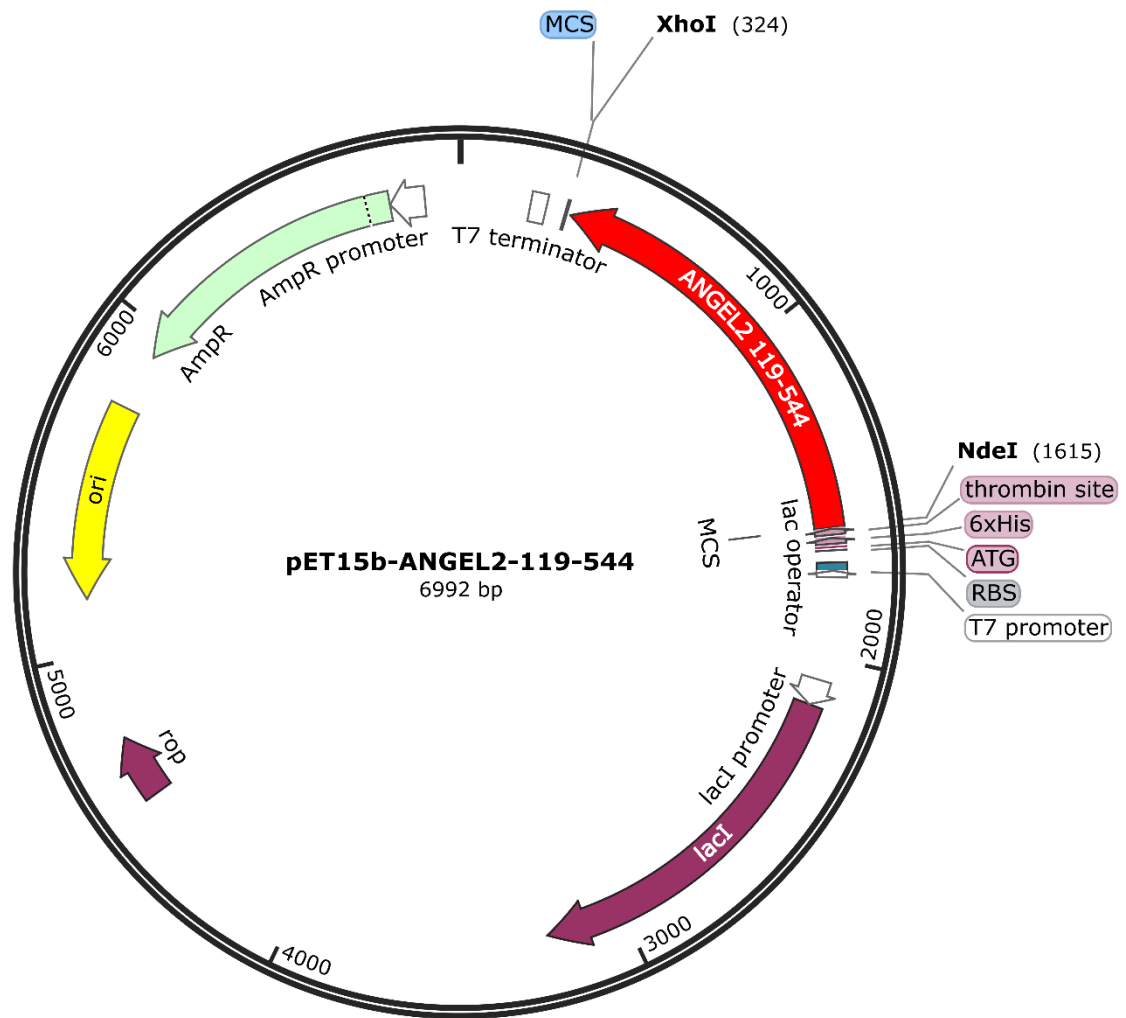

**Supplementary Fig. 21**  
**Plasmid map of pET15b-ANGEL2-AN.**

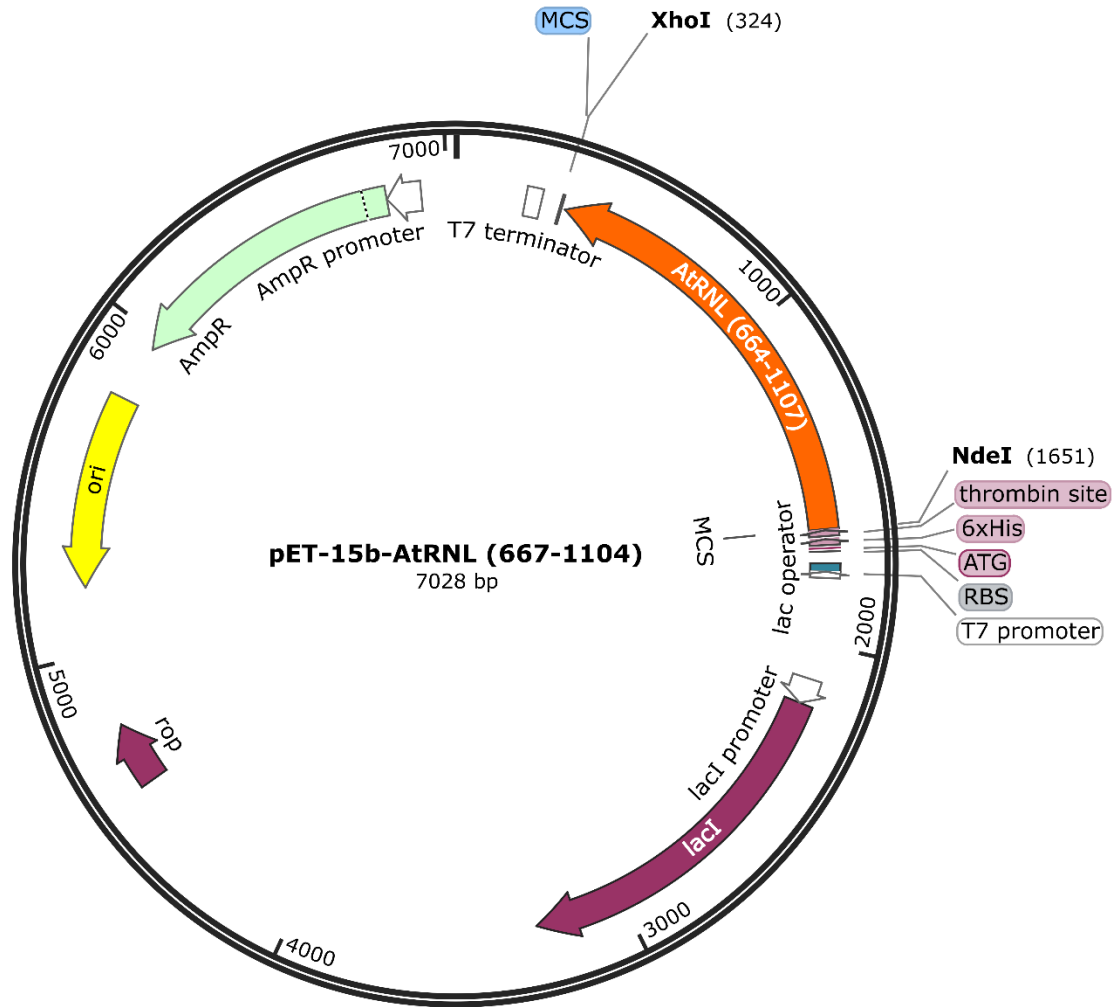

Supplementary Fig. 22  
Plasmid map of pET15b-AtRNL-CPD.



## Supplementary Tables

| Oligonucleotide | Sequence (5' to 3')                           |
|-----------------|-----------------------------------------------|
| <b>RNA 1</b>    | GGC ACU CAG ACU CAG AG                        |
| <b>RNA 2</b>    | CUC UGA GUA A                                 |
| <b>RNA 3</b>    | AGC ACU CAG ACU CAG ACU AGU AA                |
| <b>RNA 4</b>    | UUA CUA GUC UGA GUA A                         |
| <b>RNA 5</b>    | AGC ACU CAG ACU AGU GAG AAC UAG UAA           |
| <b>RNA 6</b>    | CGC ACU CAG ACU AGU GAG AAC UAG UAA           |
| <b>RNA 7</b>    | GGC ACU CAG ACU AGU GAG AAC UAG UAA           |
| <b>RNA 8</b>    | UGC ACU CAG ACU AGU GAG AAC UAG UAA           |
| <b>RNA 9</b>    | AGC ACU CAG ACU AGU GAG AAC UAG UAC           |
| <b>RNA 10</b>   | CGC ACU CAG ACU AGU GAG AAC UAG UAC           |
| <b>RNA 11</b>   | GGC ACU CAG ACU AGU GAG AAC UAG UAC           |
| <b>RNA 12</b>   | UGC ACU CAG ACU AGU GAG AAC UAG UAC           |
| <b>RNA 13</b>   | AGC ACU CAG ACU AGU GAG AAC UAG UAG           |
| <b>RNA 14</b>   | CGC ACU CAG ACU AGU GAG AAC UAG UAG           |
| <b>RNA 15</b>   | GGC ACU CAG ACU AGU GAG AAC UAG UAG           |
| <b>RNA 16</b>   | UGC ACU CAG ACU AGU GAG AAC UAG UAG           |
| <b>RNA 17</b>   | AGC ACU CAG ACU AGU GAG AAC UAG UAU           |
| <b>RNA 18</b>   | CGC ACU CAG ACU AGU GAG AAC UAG UAU           |
| <b>RNA 19</b>   | GGC ACU CAG ACU AGU GAG AAC UAG UAU           |
| <b>RNA 20</b>   | UGC ACU CAG ACU AGU GAG AAC UAG UAU           |
| <b>RNA 21</b>   | AGC CAG ACU AGU GAG AAC UAG UAA               |
| <b>RNA 22</b>   | AGC ACU AGU GAG AAC UAG UAA                   |
| <b>RNA 23</b>   | AGC ACU CAG ACU AGU AAA GCA CUC AGA CUA GUA A |
| <b>DNA 1</b>    | GGC ACT CAG ACT CAG AG                        |
| <b>DNA 2</b>    | CTC TGA GTA A                                 |

### Supplementary Table 1

Oligonucleotide sequences used in this study.

| Sample                     | WT 0 $\mu$ M | KO 0 $\mu$ M | WT 10 $\mu$ M | KO 10 $\mu$ M | WT 20 $\mu$ M | KO 20 $\mu$ M | WT 40 $\mu$ M | KO 40 $\mu$ M | WT 60 $\mu$ M | KO 60 $\mu$ M | WT 100 $\mu$ M | KO 100 $\mu$ M |
|----------------------------|--------------|--------------|---------------|---------------|---------------|---------------|---------------|---------------|---------------|---------------|----------------|----------------|
| Sample conc. [pg/ $\mu$ L] | 5,200        | 4,360        | 6,120         | 4,500         | 3,910         | 4,750         | 4,680         | 4,460         | 4,470         | 4,000         | 4,800          | 4,240          |
| 18S [pg/ $\mu$ L]          | 841          | 724          | 905           | 680           | 614           | 802           | 727           | 968           | 799           | 884           | 938            | 1,120          |
| 28S [pg/ $\mu$ L]          | 3,040        | 2,210        | 3,500         | 2,260         | 1,950         | 2,050         | 2,220         | 984           | 1,970         | 900           | 745            | 540            |
| 18S/total RNA              | 0.16         | 0.17         | 0.15          | 0.15          | 0.16          | 0.17          | 0.16          | 0.22          | 0.18          | 0.22          | 0.20           | 0.26           |
| 28S/total RNA              | 0.58         | 0.51         | 0.57          | 0.50          | 0.50          | 0.43          | 0.47          | 0.22          | 0.44          | 0.23          | 0.16           | 0.13           |
| 28S/18S                    | 3.60         | 3.00         | 3.90          | 3.30          | 3.20          | 2.60          | 3.10          | 1.00          | 2.50          | 1.00          | 0.80           | 0.50           |

## Supplementary Table 2

**RNA integrity analysis of total RNA of WT and KO HEK293 cells after menadione treatment.** Data from the experiments in **Fig. 6** were shown, indicating the total concentrations of RNA, the concentrations of 18S and 28S rRNA, the ratios of 18S and 28S rRNA to the total RNA and the 28S/18S ratio. The RNA concentrations, as well as the 28S/18S ratio, were directly calculated by the TapeStation system. The ratios of 18S and 28S to total RNA were calculated respectively from the shown concentrations. Source data are provided as a Source Data file.

## Supplementary Notes

### Determination of ATP Level in Commercially Obtained GTP

To determine the ligation activity of C12orf29 with GTP in comparison to ATP, commercially obtained GTP was used (Jena Bioscience, NU-1012S, Lot: 102.079). To investigate potential ATP contamination in this GTP sample, quantification via mass spectrometry was conducted.

For this, an Agilent 6546 Q-TOF was utilised and coupled to an Agilent Infinity 1260 II HPLC system. For an exemplary experiment see Supplementary Fig. 23 below. The samples were eluted over a Hypercarb 100 x 2.1 mm, 5  $\mu$ m column with a gradient of Solvent A (10 mM NH<sub>4</sub>OAc + 0.1% diethylamine pH = 10.0) and Solvent B (MeCN). The gradient is depicted in Supplementary Table 3.

| Time   | Solvent A | Solvent B |
|--------|-----------|-----------|
| 0 min  | 95%       | 5%        |
| 2 min  | 95%       | 5%        |
| 15 min | 0%        | 100%      |
| 20 min | 0%        | 100%      |
| 25 min | 95%       | 5%        |
| 30 min | 95%       | 5%        |

### Supplementary Table 3

**Gradient for the quantification of ATP in commercially obtained GTP.** Solvent A: 10 mM NH<sub>4</sub>OAc + 0.1% diethylamine. Solvent B: MeCN.

Calibration curves at the start and at the end of the measurements were obtained by measuring ATP samples (Jena Bioscience, NU-1010S, Lot: 102.142) in different dilutions (50, 100, 250, and 500 nM). The area of the extracted ion chromatogram of ATP (505.9879 m/z  $\pm$  10 ppm) was linearly fitted. In-between, three different 50  $\mu$ M GTP samples were measured in duplicates (10  $\mu$ L injection) and the ATP content was determined by fitting the resulting signal of ATP to the calibration curve. Representative results were illustrated in Supplementary Fig. 5. By this, an ATP content of at most 0.2% of the total GTP concentration could be determined. This corresponds to a concentration of up to 0.4  $\mu$ M ATP when using 200  $\mu$ M GTP in experiments.

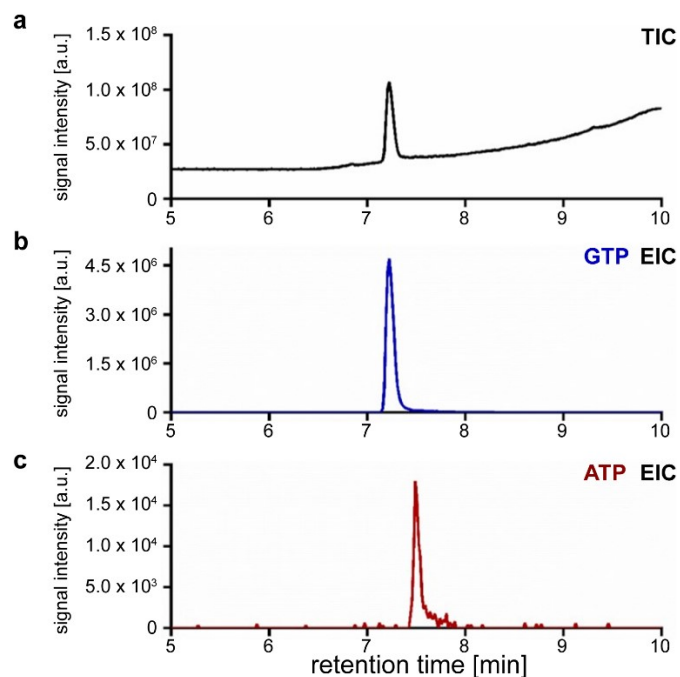

### Supplementary Fig. 23

**Determination of ATP in a commercial GTP sample by LC-MS.** **a**, Total ion chromatogram (TIC) of an exemplary LC-MS quantification experiment for the quantification of ATP in a sample of 50  $\mu\text{M}$  GTP. **b**, Extracted ion chromatogram (EIC) of GTP (521.9828  $m/z \pm 10$  ppm). **c**, EIC of ATP (505.9879  $m/z \pm 10$  ppm). Please note the about 100-fold difference in signal intensity in **b** ( $4.5 \times 10^6$ ) and **c** ( $2.0 \times 10^4$ ). a.u., arbitrary unit.

## Supplementary Methods

### Synthesis and Analysis of Chemical Probes

#### Chemicals and Reagents

Unless otherwise noted, all chemicals were purchased from commercial suppliers (abc, Acros Organics, Fluka, Carl Roth, Sigma-Aldrich, TCI, and VWR) and used without further purification. Dry solvents were used in all reactions unless otherwise noted. DIPEA was dried over CaH<sub>2</sub>, distilled, and stored over molecular sieves (4 Å) under N<sub>2</sub>. Et<sub>3</sub>N was dried over KOH, distilled, and stored over molecular sieves (4 Å) under N<sub>2</sub>. The CDCl<sub>3</sub> and DMSO-*d*<sub>6</sub> were stored over molecular sieves (4 Å) under N<sub>2</sub> if applied in the NMR measurement of P<sup>III</sup> compounds. For the preparation of aqueous solutions and buffers, ultra-pure water generated with the Merck Millipore BioPak<sup>®</sup> system (MilliQ<sup>®</sup> H<sub>2</sub>O) was used.

#### General Remarks

NMR spectra were recorded by Bruker Avance III 400 MHz, 500 MHz, and 600 MHz spectrometers at room temperature. Chemical shifts (in ppm) were calibrated using residual undertreated solvent in CDCl<sub>3</sub>, DMSO-*d*<sub>6</sub>, and D<sub>2</sub>O as references, respectively. Multiplicities are denoted as s = singlet, d = doublet, t = triplet, q = quartet, quint = quintet, m = multiplet, dd = doublet of doublets, dt = doublet of triplets, ddd = doublet of doublet of doublets, br = broad. NMR data were analysed with MestReNova (version 14.1.2-25024). Low resolution MS (LR-MS) was performed by amazon SL (ESI-ion trap) from Bruker Daltonics. High resolution MS (HR-MS) were performed by micrOTOF II (ESI-TOF) from Bruker Daltonics.

#### Synthesis of Modified Ap<sub>3</sub>A

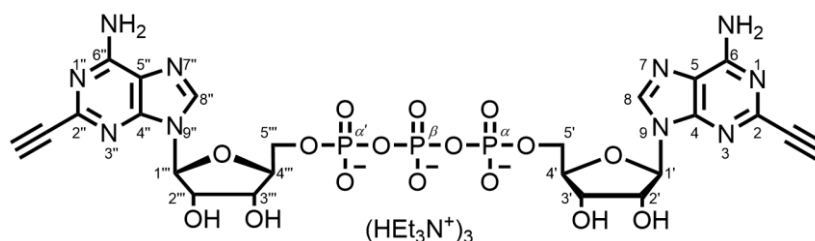

2,2''-Diethynyldiadenosine-5',5'''-triphosphate (triethylammonium salt form)

#### **C2-eAp<sub>3</sub>A**

Compound **1**<sup>6</sup> as tetrabutylammonium salt (2.0 equiv, 0.050 mmol, 36.5 mg) was co-

evaporated with MeCN (3 × 3 mL) in an oven-dried 5 mL flask and dried under vacuum for 1 h. The compound was then dissolved in 0.5 mL DMF under N<sub>2</sub>, followed by the addition of ETT (2.7 equiv, 67.5 μmol, 8.8 mg) and **2**<sup>7</sup> (1.0 equiv, 0.025 mmol, 10.7 mg). The resulting mixture was stirred at room temperature for 20 min, and TBHP<sub>(dec)</sub> (15.0 equiv, 0.375 mmol, 68.1 μL) was added in three portions. After stirring for 30 min, the reaction mixture was transferred to a falcon tube before the addition of Et<sub>2</sub>O/*n*-hexane (5:1). The resulting suspension was centrifuged to give a pellet, which was washed with Et<sub>2</sub>O/*n*-hexane (5:1) and centrifuged three times. After removing the supernatant, the pellet was dissolved in 0.5 mL DMF, and 50 μL piperidine was added to the solution. The reaction was stirred for 10 min at room temperature and was quenched by the addition of Et<sub>2</sub>O/*n*-hexane (5:1). The suspension was centrifuged to give a pellet, which was washed with Et<sub>2</sub>O/*n*-hexane (5:1) and centrifuged three times. The resulting pellet was purified via IEX-FPLC and RP-HPLC to give 9.7 mg **C2-eAp<sub>3</sub>A** in 20% yield (UV absorption estimated). <sup>1</sup>H NMR (400 MHz, D<sub>2</sub>O) δ 8.38 (s, 2H, H-8, H-8"), 5.98 (d, *J* = 4.4 Hz, 2H, H-1', H-1""), 4.63 (t, *J* = 4.6 Hz, 2H, H-2', H-2""), 4.54 (t, *J* = 5.0 Hz, 2H, H-3', H-3""), 4.41-4.34 (m, 6H, H-4', H-4"", H<sub>a</sub>-5', H<sub>a</sub>-5"", H<sub>b</sub>-5', H<sub>b</sub>-5""), 3.59 (s, 2H, C2-C≡CH, C2''-C≡CH). <sup>13</sup>C NMR (100 MHz, D<sub>2</sub>O) δ 154.8 (C-6, C-6"), 148.3 (C-4, C-4"), 144.9 (C-2, C-2"), 140.2 (C-8, C-8"), 117.9 (C-5, C-5"), 87.4 (C-1', C-1""), 83.2 (d, *J* = 9.0 Hz, C-4', C-4""), 80.8 (C2-C≡CH, C2''-C≡CH), 76.3 (C2-C≡CH, C2''-C≡CH), 75.1 (C-2', C-2""), 69.8 (C-3', C-3""), 64.8 (d, *J* = 5.0 Hz, C-5', C-5""). <sup>31</sup>P NMR (162 MHz, D<sub>2</sub>O) δ -11.52 (d, *J* = 19.4 Hz, 2P, P-α, P-α'), -23.04 (t, *J* = 19.4 Hz, 1P, P-β). HR-MS *m/z* calcd for C<sub>24</sub>H<sub>26</sub>N<sub>10</sub>O<sub>16</sub>P<sub>3</sub><sup>-</sup> (M - H)<sup>-</sup> 803.0747, found 803.0742, deviation 0.6 ppm.

### Synthesis of N<sub>3</sub>-(Arg)PEG<sub>3</sub>-DB

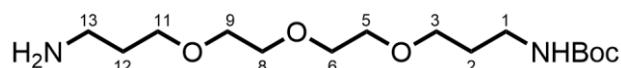

*tert*-Butyl (3-(2-(2-(3-aminopropoxy)ethoxy)ethoxy)propyl)carbamate **3**<sup>8</sup>

An oven-dried 250 mL two-neck flask was evacuated and flushed with N<sub>2</sub> trice, followed by the addition of 4,7,10-trioxa-1,13-tridecanediamine (5.2 equiv, 52.0 mmol, 11.38 mL) and 50 mL dioxane. A solution of di-*tert*-butyl dicarbonate (1.0 equiv, 10.0 mmol, 2.18 g) in 20 mL dioxane was added dropwise within 3 h at room temperature. The reaction mixture was stirred for additional 5 h and then concentrated. The residue was dissolved in 50 mL H<sub>2</sub>O and extracted with DCM (4 × 50 mL). The organic phases were collected and washed with brine (4 × 30 mL). The extraction and the subsequent washing procedure were repeated four times. The organic phases were combined, dried over MgSO<sub>4</sub>, concentrated and purified via silica chromatography (DCM:MeOH = 1:1) to give 2.94 g **3** as yellow oil in 92% yield. <sup>1</sup>H NMR (400 MHz, CDCl<sub>3</sub>) δ 5.11 (br s,

1H, NH-1), 3.63-3.60 (m, 4H, H-6, H-8), 3.58-3.56 (m, 4H, H-5, H-9), 3.54-3.50 (m, 4H, H-3, H-11), 3.22-3.17 (m, 2H, H-1), 2.81 (t,  $J = 6.6$  Hz, 2H, H-13), 2.16 (br s, 2H, NH<sub>2</sub>-13), 1.76-1.70 (m, 4H, H-2, H-12), 1.41 (s, 9H, -C(CH<sub>3</sub>)<sub>3</sub>). <sup>13</sup>C NMR (100 MHz, CDCl<sub>3</sub>)  $\delta$  156.2 (-C(=O)-), 79.0 (-C(CH<sub>3</sub>)<sub>3</sub>), 70.68, 70.65 (C-6, C-8), 70.31 (C-5), 70.26 (C-9), 69.64, 69.61 (C-3, C-11), 39.7 (C-13), 38.6 (C-1), 32.8 (C-12), 29.8 (C-2), 28.6 (-C(CH<sub>3</sub>)<sub>3</sub>). **LR-MS**  $m/z$  calcd for C<sub>15</sub>H<sub>33</sub>N<sub>2</sub>O<sub>5</sub><sup>+</sup> (M + H)<sup>+</sup> 321.24, found 321.21.

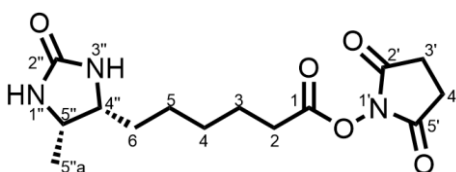

2,5-Dioxopyrrolidin-1-yl 6-((4*R*,5*S*)-5-methyl-2-oxoimidazolidin-4-yl)hexanoate **4**<sup>9</sup>

Desthiobiotin (1.0 equiv, 3.55 mmol, 761.2 mg), *N*-hydroxysuccinimide (1.0 equiv, 3.55 mmol, 408.7mg), and DCC (1.3 equiv, 4.62 mmol, 952.9 mg) were added to an oven-dried 50 mL flask, which was evacuated and flushed with N<sub>2</sub> trice, followed by the addition of 30 mL DMF. After stirring for 48 h at room temperature, the reaction mixture was filtered to remove formed *N,N'*-dicyclohexylurea. The solvent was evaporated, and 125 mL Et<sub>2</sub>O was added. The suspension was filtered after stirring for 2 h at room temperature. The resulting white solid was recrystallized in 50 mL *i*PrOH to give 851.3 mg **4** as white powder in 77% yield. <sup>1</sup>H NMR (400 MHz, DMSO-*d*<sub>6</sub>)  $\delta$  6.29 (s, 1H, NH-3''), 6.11 (s, 1H, NH-1''), 3.61 (quint,  $J = 6.7$  Hz, 1H, H-5''), 3.51-3.46 (m, 1H, H-4''), 2.81 (s, 4H, H-3', H-4'), 2.66 (t,  $J = 7.4$  Hz, 2H, H-2), 1.62 (quint,  $J = 7.1$  Hz, 2H, H-3), 1.42-1.18 (m, 6H, H-4, H-5, H-6), 0.96 (d,  $J = 6.0$  Hz, 3H, H-5''a). <sup>13</sup>C NMR (100 MHz, DMSO-*d*<sub>6</sub>)  $\delta$  170.2 (C-2', C-5'), 169.0 (C-1), 162.7 (C-2''), 54.9 (C-4''), 50.2 (C-5''), 30.1 (C-2), 29.4 (C-6), 28.0 (C-4), 25.4 (C-3', C-4'), 25.3 (C-5), 24.2 (C-3), 15.5 (C-5''a). **HR-MS**  $m/z$  calcd for C<sub>14</sub>H<sub>22</sub>N<sub>3</sub>O<sub>5</sub><sup>+</sup> (M + H)<sup>+</sup> 312.1559, found 312.1553, deviation 1.9 ppm.

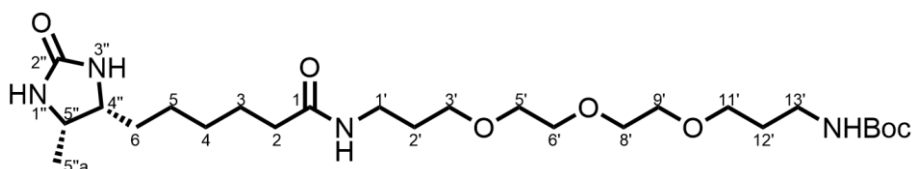

*tert*-Butyl (20-((4*R*,5*S*)-5-methyl-2-oxoimidazolidin-4-yl)-15-oxo-4,7,10-trioxa-14-azaicosyl)carbamate **5**<sup>9</sup>

Compound **4** (1.0 equiv, 3.19 mmol, 991.2 mg) and DMAP (0.1 equiv, 0.32 mmol, 39.0 mg) were added to an oven-dried 50 mL flask, which was evacuated and flushed with N<sub>2</sub> trice, followed by the addition of a solution of compound **3** (2.0 equiv, 6.38 mmol,

2.04 g) in 10 mL DMF and Et<sub>3</sub>N (1.0 equiv, 3.19 mmol, 443.4 μL). After stirring overnight at room temperature, DMF was removed, and the residue was dissolved in 50 mL DCM. The solution was successively washed with 0.5 M HCl (2 × 25 mL), 1 M K<sub>2</sub>CO<sub>3</sub> (2 × 25 mL), and brine (2 × 25 mL). The resulting organic phase was dried over MgSO<sub>4</sub>, concentrated, and purified via silica chromatography (DCM:MeOH = 20:1) to give 1.58 g **5** as pale yellow oil in 96% yield. <sup>1</sup>H NMR (400 MHz, DMSO-*d*<sub>6</sub>) δ 7.70 (t, *J* = 5.6 Hz, 1H, NH-1'), 6.73 (t, *J* = 5.8 Hz, 1H, NH-13'), 6.28 (s, 1H, NH-3''), 6.10 (s, 1H, NH-1''), 3.60 (quint, *J* = 6.7 Hz, 1H, H-5''), 3.52-3.44 (m, 9H, H-5', H-6', H-8', H-9', H-4''), 3.40-3.36 (m, 4H, H-3', H-11'), 3.06 (q, *J* = 6.5 Hz, 2H, H-1'), 2.95 (q, *J* = 6.5 Hz, 2H, H-13'), 2.03 (t, *J* = 7.4 Hz, 2H, H-2), 1.63-1.55 (m, 4H, H-2', H-12'), 1.52-1.44 (m, 2H, H-3), 1.37 (s, 9H, -C(CH<sub>3</sub>)<sub>3</sub>), 1.35-1.16 (m, 6H, H-4, H-5, H-6), 0.95 (d, *J* = 6.4 Hz, 3H, H-5''a). <sup>13</sup>C NMR (100 MHz, DMSO-*d*<sub>6</sub>) δ 171.9 (C-1), 162.8 (C-2''), 155.5 (-C(=O)-), 77.4 (-C(CH<sub>3</sub>)<sub>3</sub>), 69.7 (C-6', C-8'), 69.5 (C-5', C-9'), 68.09, 68.06 (C-3', C-11'), 55.0 (C-4''), 50.2 (C-5''), 37.2 (C-13'), 35.7 (C-1'), 35.3 (C-2), 29.7 (C-12'), 29.5 (C-6), 29.4 (C-2'), 28.7 (C-4), 28.2 (-C(CH<sub>3</sub>)<sub>3</sub>), 25.5 (C-5), 25.2 (C-3), 15.5 (C-5''a). HR-MS *m/z* calcd for C<sub>25</sub>H<sub>49</sub>N<sub>4</sub>O<sub>7</sub><sup>+</sup> (M + H)<sup>+</sup> 517.3601, found 517.3605, deviation 0.8 ppm.

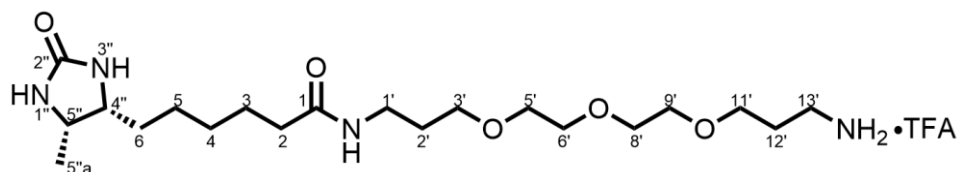

*N*-(3-(2-(2-(3-Aminopropoxy)ethoxy)ethoxy)propyl)-6-((4*R*,5*S*)-5-methyl-2-oxoimidazolidin-4-yl)hexanamide (trifluoroacetic acid salt form) **6**<sup>9</sup>

Compound **5** (1.0 equiv, 3.05 mmol, 1.57 g) was added to an oven-dried 50 mL flask, followed by the addition of 25 mL DCM. To the solution, 12.5 mL TFA was added slowly at 0 °C. The reaction mixture was warmed up to room temperature and stirred for 2 h. Then DCM and TFA was removed under high vacuum overnight. The residue was purified via silica chromatography (CHCl<sub>3</sub>:MeOH:NH<sub>3(aq)</sub> = 1:0.25:0.1) to give 1.40 g **6** as sticky yellow oil in 86% yield. <sup>1</sup>H NMR (400 MHz, DMSO-*d*<sub>6</sub>) δ 7.75 (t, *J* = 5.6 Hz, 1H, NH-1'), 6.29 (s, 1H, NH-3''), 6.12 (s, 1H, NH-1''), 4.67 (br s, 3H, NH<sub>3</sub><sup>+</sup>-13'), 3.60 (quint, *J* = 6.7 Hz, 1H, H-5''), 3.53-3.44 (m, 11H, H-5', H-6', H-8', H-9', H-11', H-4''), 3.38 (t, *J* = 6.4 Hz, 2H, H-3'), 3.06 (q, *J* = 6.4 Hz, 2H, H-1'), 2.77 (t, *J* = 7.2 Hz, 2H, H-13'), 2.03 (t, *J* = 7.4 Hz, 2H, H-2), 1.71 (quint, *J* = 6.6 Hz, 2H, H-12'), 1.60 (quint, *J* = 6.7 Hz, 2H, H-2'), 1.47 (quint, *J* = 7.3 Hz, 2H, H-3), 1.36-1.16 (m, 6H, H-4, H-5, H-6), 0.95 (d, *J* = 6.4 Hz, 3H, H-5''a). <sup>13</sup>C NMR (100 MHz, DMSO-*d*<sub>6</sub>) δ 172.0 (C-1), 162.8 (C-2''), 158.0 (q, <sup>3</sup>*J*<sub>FC</sub> = 30.7 Hz, -C(=O)CF<sub>3</sub>), 117.3 (q, <sup>2</sup>*J*<sub>FC</sub> = 298.8 Hz, -CF<sub>3</sub>), 69.74, 69.68 (C-6', C-8'), 69.52 (C-5'), 69.47 (C-9'), 68.1 (C-3'), 67.7 (C-11'), 55.0



(C-4''), 50.2 (C-5''), 37.4 (C-13'), 35.7 (C-1'), 35.3 (C-2), 29.5 (C-6), 29.4 (C-2'), 29.0 (C-12'), 28.7 (C-4), 25.6 (C-5), 25.2 (C-3), 15.5 (C-5''a).  $^{19}\text{F}$  NMR (376 MHz, DMSO- $d_6$ )  $\delta$  -73.6 (-CF<sub>3</sub>). **HR-MS**  $m/z$  calcd for C<sub>20</sub>H<sub>41</sub>N<sub>4</sub>O<sub>5</sub><sup>+</sup> (M + H)<sup>+</sup> 417.3077, found 417.3069, deviation 1.9 ppm.

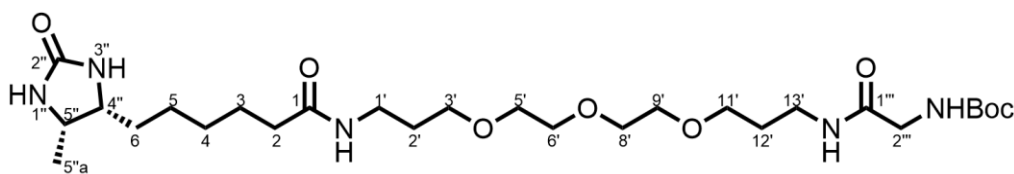

*tert*-Butyl (23-((4*R*,5*S*)-5-methyl-2-oxoimidazolidin-4-yl)-2,18-dioxo-7,10,13-trioxa-3,17-diazatricosyl)carbamate **7**

DMAP (0.1 equiv, 0.13 mmol, 15.9 mg) and Boc-Gly-NHS (1.5 equiv, 1.95 mmol, 530.6 mg) was added to an oven-dried 25 mL flask, which was evacuated and flushed with N<sub>2</sub> trice, followed by the addition of a solution of compound **6** (1.0 equiv, 1.30 mmol, 689.4 mg) in 10 mL DMF and Et<sub>3</sub>N (2.5 equiv, 3.25 mmol, 451.7  $\mu$ L). After stirring overnight at room temperature, DMF was removed, and the residue was dissolved in 50 mL DCM. The solution was washed with brine (1  $\times$  25 mL), which was extracted with DCM (4  $\times$  50 mL). The combined organic phases were dried over MgSO<sub>4</sub>, concentrated, and purified via silica chromatography (DCM:MeOH = 20:1) to give 707.6 mg **7** as sticky colorless oil in 95% yield.  $^1\text{H}$  NMR (400 MHz, DMSO- $d_6$ )  $\delta$  7.72-7.70 (m, 2H, NH-1', NH-13'), 6.87 (t,  $J$  = 6.2 Hz, 1H, NH-2'''), 6.28 (s, 1H, NH-3''), 6.10 (s, 1H, NH-1''), 3.60 (quint,  $J$  = 6.8 Hz, 1H, H-5''), 3.53-3.45 (m, 11H, H-5', H-6', H-8', H-9', H-4'', H-2'''), 3.40-3.36 (m, 4H, H-3', H-11'), 3.12-3.04 (m, 4H, H-1', H-13'), 2.03 (t,  $J$  = 7.4 Hz, 2H, H-2), 1.65-1.57 (m, 4H, H-2', H-12'), 1.47 (quint,  $J$  = 7.3 Hz, 2H, H-3), 1.38 (s, 9H, -C(CH<sub>3</sub>)<sub>3</sub>), 1.36-1.16 (m, 6H, H-4, H-5, H-6), 0.95 (d,  $J$  = 6.4 Hz, 3H, H-5''a).  $^{13}\text{C}$  NMR (100 MHz, DMSO- $d_6$ )  $\delta$  171.9 (C-1), 169.1 (C-1'''), 162.8 (C-2''), 155.5 (-COO-), 78.0 (-C(CH<sub>3</sub>)<sub>3</sub>), 69.74, 69.73 (C-6', C-8'), 69.5 (C-5', C-9'), 68.1 (C-3', C-11'), 55.0 (C-4''), 50.2 (C-5''), 43.3 (C-2'''), 35.9 (C-13'), 35.7 (C-1'), 35.3 (C-2), 29.5 (C-6), 29.4 (C-2'), 29.3 (C-12'), 28.7 (C-4), 28.2 (-C(CH<sub>3</sub>)<sub>3</sub>), 25.6 (C-5), 25.2 (C-3), 15.5 (C-5''a). **HR-MS**  $m/z$  calcd for C<sub>27</sub>H<sub>52</sub>N<sub>5</sub>O<sub>8</sub><sup>+</sup> (M + H)<sup>+</sup> 574.3810, found 574.3821, deviation 2.0 ppm.

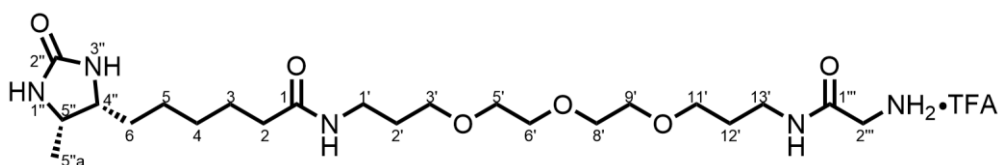

*N*-(1-Amino-2-oxo-7,10,13-trioxa-3-azahexadecan-16-yl)-6-((4*R*,5*S*)-5-methyl-2-oxoimidazolidin-4-yl)hexanamide (trifluoroacetic acid salt form) **8**

Compound **7** (1.0 equiv, 1.22 mmol, 697.0 mg) was added to an oven-dried 50 mL flask, followed by the addition of 10 mL DCM. To the solution, 5.0 mL TFA was added slowly at 0 °C. The reaction mixture was warmed up to room temperature and stirred for 2 h. Then DCM and TFA was removed under high vacuum overnight. The residue was purified via silica chromatography (CHCl<sub>3</sub>:MeOH:NH<sub>3(aq)</sub> = 1:0.25:0.1) to give 568.3 mg of **8** sticky pale yellow oil in 80% yield. <sup>1</sup>H NMR (400 MHz, DMSO-*d*<sub>6</sub>) δ 7.86 (t, *J* = 5.8 Hz, 1H, NH-1'), 7.72 (t, *J* = 5.6 Hz, 1H, NH-13'), 6.28 (s, 1H, NH-3''), 6.10 (s, 1H, NH-1''), 3.60 (quint, *J* = 6.7 Hz, 1H, H-5''), 3.53-3.45 (m, 9H, H-5', H-6', H-8', H-9', H-4''), 3.42-3.36 (m, 4H, H-3', H-11'), 3.28 (br s, 3H, NH<sub>3</sub><sup>+</sup>-2'''), 3.13 (q, *J* = 6.4 Hz, 2H, H-1'), 3.10 (s, 2H, H-2'''), 3.06 (q, *J* = 6.4 Hz, 2H, H-13'), 2.03 (t, *J* = 7.4 Hz, 2H, H-2), 1.67-1.57 (m, 4H, H-2', H-12'), 1.51-1.44 (m, 2H, H-3), 1.36-1.15 (m, 6H, H-4, H-5, H-6), 0.95 (d, *J* = 6.4 Hz, 3H, H-5''a). <sup>13</sup>C NMR (100 MHz, DMSO-*d*<sub>6</sub>) δ 171.93 (C-1), 171.85 (C-1'''), 162.8 (C-2''), 69.8 (C-6', C-8'), 69.53 (C-5', C-9'), 68.2 (C-3'), 68.1 (C-11'), 55.0 (C-4''), 50.2 (C-5''), 44.2 (C-2'''), 35.8 (C-13'), 35.7 (C-1'), 35.3 (C-2), 29.5 (C-6), 29.4 (C-2'), 29.3 (C-12'), 28.7 (C-4), 25.6 (C-5), 25.2 (C-3), 15.5 (C-5''a). <sup>19</sup>F NMR (376 MHz, DMSO-*d*<sub>6</sub>) δ -73.5 (-CF<sub>3</sub>). HR-MS *m/z* calcd for C<sub>22</sub>H<sub>44</sub>N<sub>5</sub>O<sub>6</sub><sup>+</sup> (M + H)<sup>+</sup> 474.3286, found 474.3282, deviation 0.8 ppm.

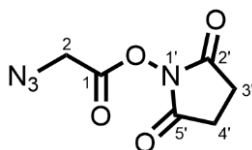

2,5-Dioxopyrrolidin-1-yl 2-azidoacetate **9**<sup>10</sup>

*N*-Hydroxysuccinimide (1.0 equiv, 4.50 mmol, 517.6 mg) was added to an oven-dried 25 mL flask, which was evacuated and flushed with N<sub>2</sub> trice, followed by the addition of 5.0 mL THF. After cooling down in ice bath, 2-azidoacetic acid (1.0 equiv, 4.50 mmol, 336.7 μL) was added and stirred for 10 min at 0 °C. DCC (1.0 equiv, 4.50 mmol, 928.5 mg) was suspended in 5.0 mL THF and added dropwise. The reaction mixture was stirred for 4 h at 0 °C, followed by filtration to remove formed *N,N'*-dicyclohexylurea. 50 mL Et<sub>2</sub>O was added to the filtrate, which was stored at 4 °C overnight. The forming white solid was collected, rinsed with Et<sub>2</sub>O (20 mL), and dried to give 669.0 mg of **9** as white crystal solid in 75% yield. <sup>1</sup>H NMR (400 MHz, CDCl<sub>3</sub>) δ 4.24 (s, 2H, H-2), 2.87 (s, 4H, H-3', H-4'). <sup>13</sup>C NMR (100 MHz, CDCl<sub>3</sub>) δ 168.5 (C-2', C-5'), 164.3 (C-1), 48.1 (C-2), 25.7 (C-3', C-4'). HR-MS *m/z* calcd for C<sub>6</sub>H<sub>7</sub>N<sub>4</sub>O<sub>4</sub><sup>+</sup> (M + H)<sup>+</sup> 199.0467, found 199.0460, deviation 3.5 ppm.

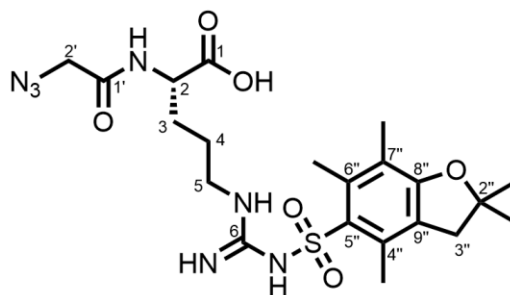

*N*<sup>2</sup>-(2-Azidoacetyl)-*N*<sup>0</sup>-((2,2,4,6,7-pentamethyl-2,3-dihydrobenzofuran-5-yl)sulfonyl)-L-arginine **10**

In an oven-dried 50 mL flask, Fmoc-Arg(Pbf)-OH (1.0 equiv, 2.00 mmol, 1.298 g) was suspended in 30 mL DCM, followed by the addition of piperidine (5.0 equiv, 10.0 mmol, 987.8  $\mu$ L). The reaction mixture was stirred for 16 h at room temperature and concentrated under reduced pressure. The resulting residue was added methyl *tert*-butyl ether (MTBE) to yield white precipitate, which was collected by filtration and washed with MTBE to give Fmoc deprotected intermediate Arg(Pbf)-OH. The white solid was dried under vacuum and used without further purification. DMAP (0.1 equiv, 0.20 mmol, 24.4 mg) and compound **52** (1.5 equiv, 3.00 mmol, 594.1 mg) was added to the flask containing Arg(Pbf)-OH, which was evacuated and flushed with N<sub>2</sub> trice, followed by the addition of 10 mL DMF and Et<sub>3</sub>N (2.5 equiv, 5.00 mmol, 695.0  $\mu$ L). After stirring overnight at room temperature, DMF was removed, and the residue was pre-purified via silica chromatography (DCM:MeOH = 20:1 ~ 3:1). Further RP-HPLC purification gave 472.2 mg **10** as pale yellow solid in 46% yield over two steps. <sup>1</sup>H NMR (400 MHz, DMSO-*d*<sub>6</sub>)  $\delta$  12.76 (br s, 1H, OH-1), 8.36 (d, *J* = 7.6 Hz, 1H, NH-2), 6.73-6.42 (m, 3H, -NH<sub>2</sub>(NH)<sub>2</sub>), 4.21-4.16 (m, 1H, H-2), 3.85 (s, 2H, H-2'), 3.04 (q, *J* = 6.5 Hz, 2H, H-5), 2.96 (s, 2H, H-3''), 2.48 (s, 3H, CH<sub>3</sub>-6''), 2.42 (s, 3H, CH<sub>3</sub>-4''), 2.01 (s, 3H, CH<sub>3</sub>-7''), 1.76-1.67 (m, 1H, H<sub>a</sub>-3), 1.60-1.51 (m, 1H, H<sub>b</sub>-3), 1.45-1.41 (m, 2H, H-4), 1.41 (s, 6H, CH<sub>3</sub>-2''). <sup>13</sup>C NMR (100 MHz, DMSO-*d*<sub>6</sub>)  $\delta$  173.0 (C-1), 167.4 (C-1'), 157.4 (C-8''), 156.1 (C-6), 137.2 (C-7''), 134.2 (C-5''), 131.4 (C-4''), 124.3 (C-9''), 116.3 (C-6''), 86.3 (C-2''), 51.8 (C-2), 50.4 (C-2'), 42.5 (C-3''), 39.6 (C-5, overlapped by DMSO-*d*<sub>6</sub>), 28.4 (C-3), 28.3 (CH<sub>3</sub>-2''), 25.6 (C-4), 18.9 (CH<sub>3</sub>-4''), 17.6 (CH<sub>3</sub>-6''), 12.3 (CH<sub>3</sub>-7''). HR-MS *m/z* calcd for C<sub>21</sub>H<sub>30</sub>N<sub>7</sub>O<sub>6</sub>S<sup>-</sup> (M - H)<sup>-</sup> 508.1978, found 508.1985, deviation 1.4 ppm.



*N*-((*S*)-1-Amino-6-(2-azidoacetamido)-1-imino-7,10-dioxo-15,18,21-trioxa-2,8,11-triazatetracosan-24-yl)-6-((4*R*,5*S*)-5-methyl-2-oxoimidazolidin-4-yl)hexanamide  
**N<sub>3</sub>-(Arg)PEG<sub>3</sub>-DB**

An oven-dried 10 mL flask was evacuated and flushed with N<sub>2</sub> trice, followed by the addition of compound **8** (1.0 equiv, 0.30 mmol, 1.10 mL 0.273 M solution in DMF) and Et<sub>3</sub>N (1.0 equiv, 0.30 mmol, 41.7 μL). Meanwhile, compound **9** (2.0 equiv, 0.60 mmol, 305.5 mg) and HOBT·xH<sub>2</sub>O (2.0 equiv, 0.60 mmol, 91.8 mg) was added to another oven-dried 10 mL flask, which was evacuated and flushed with N<sub>2</sub> trice, followed by the addition of 3.0 mL DMF. Then DCC (2.0 equiv, 0.60 mmol, 92.9 μL) was added and stirred for 15 min at room temperature, which was transferred to the flask containing compound **8** and Et<sub>3</sub>N. After stirring for 3 h at room temperature, DMF was removed, and the residue was roughly purified via RP-HPLC. All fractions that contained Pbf-protected product were pooled, concentrated, and lyophilised. The crude product was then dissolved in 1 M HCl in HFIP and stirred for 8 h at room temperature to remove Pbf group. The reaction mixture was concentrated and purified via RP-HPLC with C18 Pyramid column using 0.1% TFA MilliQ<sup>®</sup> H<sub>2</sub>O/0.1% TFA MeCN system. All fractions that contained Pbf-deprotected product were pooled, concentrated, and further purified via RP-HPLC with C18 column using MilliQ<sup>®</sup> H<sub>2</sub>O /MeCN system to remove excess amount of TFA to give 126.6 mg of **N<sub>3</sub>-(Arg)PEG<sub>3</sub>-DB** as colorless oil in 59% yield over two steps. <sup>1</sup>H NMR (400 MHz, DMSO-*d*<sub>6</sub>) δ 8.52 (d, *J* = 7.2 Hz, 1H, NH-2\*), 8.40 (t, *J* = 5.8 Hz, 1H, NH-2''), 7.82-7.75 (m, 3H, NH-1', NH-13', NH-3''), 7.44-7.19 (m, 5H, NH-1'', -NHC(NH)NH<sub>2</sub>), 4.25 (q, *J* = 6.8 Hz, 1H, H-2\*), 3.90 (s, 2H, H-2\*\*), 3.72-3.58 (m, 3H, H-5'', H-2'''), 3.51-3.45 (m, 9H, H-5', H-6', H-8', H-9', H-4''), 3.40-3.36 (m, 4H, H-3', H-11'), 3.12-3.03 (m, 6H, H-1', H-13', H-5\*), 2.04 (t, *J* = 7.4 Hz, 2H, H-2), 1.77-1.15 (m, 16 H, H-3, H-4, H-5, H-6, H-2', H-12', H-3\*, H-4\*), 0.96 (d, *J* = 6.0 Hz, 3H, H-5''a). <sup>13</sup>C NMR (100 MHz, DMSO-*d*<sub>6</sub>) δ 172.0 (C-1), 171.3 (C-1\*), 168.5 (C-1'''), 167.9 (C-1\*\*), 162.8 (C-2''), 157.0 (C-6\*), 69.8 (C-6', C-8'), 69.5 (C-5', C-9'), 68.1 (C-3'), 68.0 (C-11'), 55.0 (C-4''), 52.7 (C-2\*), 50.5 (C-2\*\*), 50.3 (C-5''), 42.1 (C-2'''), 40.3 (C-5\*), 35.9 (C-13'), 35.7 (C-1'), 35.3 (C-2), 29.5 (C-6), 29.4 (C-2'), 29.2 (C-12'), 28.8 (C-4), 28.7 (C-3\*), 25.6 (C-5), 25.2 (C-3), 25.0 (C-4\*), 15.5 (C-5''a). **HR-MS** *m/z* calcd for C<sub>30</sub>H<sub>57</sub>N<sub>12</sub>O<sub>8</sub><sup>+</sup> (M + H)<sup>+</sup> 713.4422, found 713.4422, deviation 0.0 ppm.

## Plasmid Construction

The gene fragments of C12orf29<sup>WT</sup>, AtRNL-CPD (667-1104), ANGEL2-ΔN (119-544), bearing 5'-NdeI and 3'-XhoI restriction cleavage sites were synthesised by Integrated DNA Technologies. Sequence information is listed in “Sequence Information” section in Supplementary Methods. The gene fragments were ligated into pJET1.2/blunt vector using CloneJET PCR Cloning Kit for amplification. The NdeI and XhoI restriction digested gene fragments and pET15b vector were isolated and ligated.

## Site-directed Mutagenesis

50 ng plasmid DNA templates were mixed with 0.4 μM forward primers and 0.4 μM reverse primers in 1x Pfu reaction buffer with 0.4 mM dNTPs each and 2.5 units of Pfu Turbo DNA polymerase in a total volume of 50 μL. The reaction mixture was applied for PCR by the following program:

| Step                 | Conditions    |
|----------------------|---------------|
| Initial denaturation | 95 °C, 2 min  |
| Denaturation         | 95 °C, 15 s   |
| Primer annealing     | 55 °C, 30 s   |
| Extension            | 68 °C, 10 min |
| Elongation           | 68 °C, 12 min |
| Stopping             | 4 °C, pause   |

} 20 cycles

Afterwards, 10 μL of PCR reaction mixture was incubated with 40 units of DpnI in 1x CutSmart<sup>®</sup> buffer for 30 min at 37 °C in a total volume of 50 μL. 10 μL of the resulting mixture was transformed into NEB Turbo chemically competent *E. coli* cells and plasmids were isolated for analysis.

## Expression and Purification of Recombinant Proteins

### Expression and Purification of Plant tRNA Ligase AtRNL

Plasmid constructs pET28a-At-TRL (Addgene: #32242) were transformed in *E. coli* BL21 (DE3) RIL competent cells, which were cultured in 50 mL LB medium containing 50 μg/mL kanamycin at 37 °C, 180 rpm overnight. In turn, a defined volume of cell suspension was transferred to 1 L LB medium containing 50 μg/mL kanamycin to reach OD<sub>600</sub> = 0.1, followed by the incubation at 37 °C at 180 rpm until OD<sub>600</sub> = 0.7. The mixture was cooled down on ice for 30 min and then incubated with 0.4 mM IPTG and 2% (v/v) ethanol at 17 °C for 20 h at 180 rpm. Cells were harvested by centrifugation at 4,400 rpm for 30 min at 4 °C. The pellet was resuspended in 30 mL cold lysis buffer (50 mM Tris-HCl pH 7.5, 250 mM NaCl, 10% (v/v) glycerol, 0.1% (v/v) Triton-X100, 20 mM imidazole, 1 μg/mL aprotinin, 1 μg/mL leupeptin, and 1 mg/mL Pefabloc<sup>®</sup> SC)

and lysed by sonication. The lysates were centrifuged at 40,000 x g for 30 min at 4 °C and filtered through 0.45 µm syringe filter. The His<sub>6</sub>-tagged AtRNL was purified using a 5 mL HisTrap<sup>TM</sup> FF crude column (Buffer A: 50 mM Tris-HCl pH 7.5, 250 mM NaCl, 10% (v/v) glycerol, and 20 mM imidazole; Buffer B: 50 mM Tris-HCl pH 7.5, 250 mM NaCl, 10% (v/v) glycerol, and 500 mM imidazole). Fractions containing His<sub>6</sub>-tagged AtRNL were pooled and dialysed against a buffer containing 50 mM Tris-HCl pH 7.5, 250 mM NaCl, 5 U/mg thrombin, 10% glycerol, and 20 mM imidazole at 4 °C overnight. The resulting solution was purified again using a 5 mL HisTrap<sup>TM</sup> FF crude column (Buffer A: 50 mM Tris-HCl pH 7.5, 250 mM NaCl, 10% (v/v) glycerol, and 20 mM imidazole; Buffer B: 50 mM Tris-HCl pH 7.5, 250 mM NaCl, 10% (v/v) glycerol, and 500 mM imidazole). The AtRNL were recovered in the flow-through, concentrated, and stored at -20 °C in a storage buffer containing 25 mM Tris-HCl pH 8.0, 100 mM NaCl, and 50% (v/v) glycerol.

*Expression and Purification of the Cyclic Phosphodiesterase Domain of Plant tRNA Ligase AtRNL (AtRNL-CPD)*

Plasmid constructs pET15b-AtRNL-CPD were transformed in *E. coli* BL21 (DE3) competent cells, which were cultured in 50 mL LB medium containing 100 µg/mL carbenicillin at 37 °C, 180 rpm overnight. In turn, a defined volume of cell suspension was transferred to 1 L LB medium containing 100 µg/mL carbenicillin to reach OD<sub>600</sub> = 0.1, followed by the incubation at 37 °C at 180 rpm until OD<sub>600</sub> = 1.0. The mixture was cooled down on ice for 30 min and then incubated with 1.0 mM IPTG and 2% (v/v) ethanol at 20 °C for 18 h at 180 rpm. Cells were harvested by centrifugation at 4,400 rpm for 30 min at 4 °C. The pellet was resuspended in 30 mL cold lysis buffer (50 mM Tris-HCl pH 8.0, 200 mM NaCl, 10% (v/v) glycerol, 0.2% (v/v) Triton X-100, 20 mM imidazole, 1 µg/mL aprotinin, 1 µg/mL leupeptin, and 1 mg/mL Pefabloc<sup>®</sup> SC) and lysed by sonication. The lysates were centrifuged at 40,000 x g for 30 min at 4 °C and filtered through 0.45 µm syringe filter. The His<sub>6</sub>-tagged AtRNL-CPD was purified using a 5 mL HisTrap<sup>TM</sup> FF crude column (Buffer A: 50 mM Tris-HCl pH 8.0, 200 mM NaCl, 10% (v/v) glycerol, and 20 mM imidazole; Buffer B: 50 mM Tris-HCl pH 8.0, 200 mM NaCl, 10% (v/v) glycerol, and 500 mM imidazole). Fractions containing His<sub>6</sub>-tagged AtRNL were pooled and dialysed against a buffer containing 50 mM Tris-HCl pH 8.0, 200 mM NaCl, 5 U/mg thrombin, 10% glycerol, and 20 mM imidazole at 4 °C overnight. The resulting solution was purified again using a 5 mL HisTrap<sup>TM</sup> FF crude column (Buffer A: 50 mM Tris-HCl pH 8.0, 200 mM NaCl, 10% (v/v) glycerol, and 20 mM imidazole; Buffer B: 50 mM Tris-HCl pH 8.0, 200 mM NaCl, 10% (v/v) glycerol, and 500 mM imidazole). The AtRNL-CPD were recovered in the flow-through,

concentrated, and stored at -20 °C in a storage buffer containing 25 mM Tris-HCl pH 8.0, 100 mM NaCl, and 50% (v/v) glycerol.

## **Immunoblotting**

Proteins were resolved by SDS-PAGE, transferred onto the MeOH-activated 0.2 µM PVDF membrane (Amersham™), and probed with anti-C12orf29 (Santa Cruz Biotechnology, sc-390730, 1:1,000), anti-p150 (Bioscience, 610474, 1:1,000) and anti-AMPylation antibodies<sup>11</sup> (1:1,000) kindly provided by Itzen Aymelt and colleagues, UKE, University of Hamburg. Anti-mouse antibody (Jackson ImmunoResearch, 115-035-062, 1:30,000) was used as secondary antibodies. Blots were developed using Pierce™ ECL Western Blotting Substrate (Thermo Fisher) or Pierce™ Fast Western Kit, SuperSignal™ West Pico (Thermo Fisher).

## **Preparation of Ligase Substrates**

### *Preparation of Nicked RNA/DNA Duplexes*

0.5 µM 5' <sup>32</sup>P-labelled RNA/DNA oligonucleotides were mixed with 1.0 µM DNA splint oligo and 2.5 µM of the second RNA/DNA oligo in 1x annealing buffer (10 mM Tris-HCl pH 6.8 and 200 mM NaCl) (Sequences are shown in Supplementary Table 1). The mixture was prepared freshly and applied for annealing by the following program:

| Temperature | Time   |
|-------------|--------|
| 65 °C       | 10 min |
| 37 °C       | 15 min |
| 22 °C       | 30 min |
| 4 °C        | pause  |

### *Preparation of RNA Oligo4 Bearing 2'-PO<sub>4</sub>-3'-OH on the 3' Ends*

0.5 µM RNA oligo4 bearing 2',3'-cPO<sub>4</sub> were incubated with 2.0 µM AtRNL-CPD in 50 mM Tris-HCl pH 7.5, 10 mM MgCl<sub>2</sub>, and 2 mM DTT in a total volume of 4.0 mL. The reaction was split in a 96-well plate and incubated at 37 °C for 1.5 h. Each reaction was stopped by adding 5 µL pre-cold 50 mM EDTA pH 8.0 solution and heating at 95 °C for 2 min. All resulting mixtures were combined and purified with Oligo Clean & Concentrator Kit (Zymo Research).

### *Preparation of Broken RNA Hairpins*

For preparing the complexes with 5'-PO<sub>4</sub> and 2'-OH-3'-OH overhangs, 0.5 µM 5' <sup>32</sup>P-labelled RNA were mixed with 2.5 µM RNA that donate 2'-OH-3'-OH ends in MilliQ®

H<sub>2</sub>O. The mixture was prepared freshly and applied for the annealing program shown below.

For preparing the complexes with 5'-PO<sub>4</sub> and 2'-PO<sub>4</sub>-3'-OH overhangs, 0.5 μM 5' <sup>32</sup>P-labelled RNA were mixed with 2.5 μM RNA that donate 2'-PO<sub>4</sub>-3'-OH ends in MilliQ<sup>®</sup> H<sub>2</sub>O. The mixture was prepared freshly and applied for the annealing program shown below.

For preparing the complexes with 5'-OH and 2',3'-cPO<sub>4</sub> overhangs, 0.5 μM 5' <sup>32</sup>P-labelled RNA oligo4 bearing 2',3'-cPO<sub>4</sub> ends were mixed with 2.5 μM RNA that donate 5'-OH ends in MilliQ<sup>®</sup> H<sub>2</sub>O. The mixture was prepared freshly and applied for the annealing program shown below.

For preparing the complexes with 5'-PO<sub>4</sub> and 2',3'-cPO<sub>4</sub> overhangs, 0.5 μM 5' <sup>32</sup>P-labelled RNA oligo4 were mixed with 0.6 μM RNA oligo3 that donate 5'-PO<sub>4</sub> ends in MilliQ<sup>®</sup> H<sub>2</sub>O. The mixture was prepared freshly and applied for the annealing program shown below.

The annealing step followed program:

| Temperature | Time  |
|-------------|-------|
| 95 °C       | 2 min |
| 65 °C       | 30 s  |
| 55 °C       | 30 s  |
| 45 °C       | 30 s  |
| 25 °C       | 30 s  |
| 15 °C       | 30 s  |
| 10 °C       | 30 s  |
| 4 °C        | pause |

## General Procedures of RNA Ligation Assays

### General Procedure of RNA Ligation with T4 RNA Ligase 1

0.1 μM 5' <sup>32</sup>P-labelled oligonucleotide substrates were incubated with 5 units of T4 RNA ligase 1 (New England Biolabs, M0204S) and 1.0 mM ATP in 1x T4 RNA ligase reaction buffer with 20% PEG8000 at 25 °C for 2 h in a total volume of 10 μL. The reaction was quenched by adding 10 μL stopping solution and heating at 95 °C for 2 min. 1 μL of the resulting mixture was further diluted to give 0.005 μM 5' <sup>32</sup>P-labelled oligonucleotides. Samples were resolved by urea-PAGE and analysed by autoradiographic imaging.

### General Procedure of RNA Ligation with T4 RNA Ligase 2



0.1  $\mu\text{M}$  5'  $^{32}\text{P}$ -labelled oligonucleotide substrates were incubated with 5 units of T4 RNA ligase 2 in 1x T4 Rnl2 (New England Biolabs, M0239S) reaction buffer with 10 mM  $\text{MgCl}_2$  at 37 °C 1 h in a total volume of 10  $\mu\text{L}$ . The reaction was quenched by adding 10  $\mu\text{L}$  stopping solution and heating at 95 °C for 2 min. 1  $\mu\text{L}$  of the resulting mixture was further diluted to give 0.005  $\mu\text{M}$  5'  $^{32}\text{P}$ -labelled oligonucleotides. Samples were resolved by urea-PAGE and analysed by autoradiographic imaging.

#### General Procedure of RNA Ligation with AtRNL

0.1  $\mu\text{M}$  5'  $^{32}\text{P}$ -labelled oligonucleotide substrates were incubated with 5  $\mu\text{M}$  AtRNL and 100  $\mu\text{M}$  ATP in 1x RNA ligation buffer (50 mM Tris-HOAc pH 7.0, 5 mM  $\text{MgCl}_2$ , and 1 mM DTT) at 37 °C 1 h in a total volume of 10  $\mu\text{L}$ . The reaction was quenched by adding 10  $\mu\text{L}$  stopping solution and heating at 95 °C for 2 min. 1  $\mu\text{L}$  of the resulting mixture was further diluted to give 0.005  $\mu\text{M}$  5'  $^{32}\text{P}$ -labelled oligonucleotides. Samples were resolved by urea-PAGE and analysed by autoradiographic imaging.

#### General Procedure of RNA Ligation with RtcB

0.1  $\mu\text{M}$  5'  $^{32}\text{P}$ -labelled oligonucleotide substrates were incubated with 1  $\mu\text{M}$  RtcB (New England Biolabs, M0458S) and 100  $\mu\text{M}$  GTP in 1x RtcB reaction buffer with 1 mM  $\text{MnCl}_2$  at 37 °C 1 h in a total volume of 10  $\mu\text{L}$ . The reaction was quenched by adding 10  $\mu\text{L}$  stopping solution and heating at 95 °C for 2 min. 1  $\mu\text{L}$  of the resulting mixture was further diluted to give 0.005  $\mu\text{M}$  5'  $^{32}\text{P}$ -labelled oligonucleotides. Samples were resolved by urea-PAGE and analysed by autoradiographic imaging.

### **Nucleotide Screening in RNA Ligation Assay (Fig. 3b)**

In the nucleotide screening study, 0.1  $\mu\text{M}$  5'  $^{32}\text{P}$ -labelled RNA oligo1 and 0.5  $\mu\text{M}$  RNA oligo2 were incubated with 1.0  $\mu\text{M}$  C12orf29<sup>WT</sup> and 200  $\mu\text{M}$  of the indicated nucleotides in 1x RNA ligation buffer at 37 °C for 1 h in a total volume of 10  $\mu\text{L}$ . The reaction was stopped by adding 150  $\mu\text{L}$  stopping solution and heating at 95 °C for 2 min. 1  $\mu\text{L}$  of samples were resolved by urea-PAGE and analysed by autoradiographic imaging.

### **Autoradiographic Analysis**

#### Urea-PAGE Analysis and Phosphorimaging

Samples were quenched by adding stopping solution and denaturing at 95 °C for 2 min. 1  $\mu\text{L}$  of denatured sample were loaded onto a pre-warmed 12% urea-PAGE sequencing gel. Electrophoresis was performed in 1x TBE buffer (90 mM Tris-HCl pH 8.0, 90 mM

boric acid, 2.0 mM EDTA) at constant power of 100 W. The gel was transferred onto Whatman® filter paper and dried at 80 °C for 2 h under vacuum. After cooling down to room temperature, the gel was exposed to a storage phosphor screen, of which the readout was performed by Typhoon™ FLA-9500 in phosphorimaging mode and further processed by Image Lab, Bio-Rad.

### SDS-PAGE and Phosphorimaging

Samples were mixed with 6x loading buffer to a final concentration of 1x loading buffer and denatured at 95 °C for 5 min. Separation of proteins were realized by using 4% acrylamide stacking gel and 12.5% acrylamide resolving gel. As references an unstained or pre-stained protein ladder was used. Electrophoresis was performed in 1x SDS running buffer at constant voltage of 220 V for 40 min. The gel was stained by Coomassie staining solution at room temperature for 30 min after electrophoresis, followed by destaining, rinsing with MilliQ® H<sub>2</sub>O, and imaging. In turn, the gel was soaked in the fixing solution (3% (v/v) glycerol, 20% (v/v) HOAc, 20% (v/v) MeOH) at room temperature for 30 min and rinsed in MilliQ® H<sub>2</sub>O for 5 min before being transferred onto Whatman® filter paper and drying at 80 °C for 1 h under vacuum. After cooling down to room temperature, the gel was exposed to a storage phosphor screen, of which the readout was performed by Typhoon™ FLA-9500 in phosphorimaging mode and further processed by Image Lab, Bio-Rad.

### **Kinetic Analysis of C12orf29-catalysed RNA Ligation (Fig. 3c)**

Steady state kinetics of C12orf29 were measured at different ATP or GTP concentrations. Nucleotide concentrations used were 30, 20, 10, 5.0, 2.0, 1.0, 0.5 and 0.1 μM for ATP and 200, 150, 100, 75, 50, 25, 10 and 2.0 μM for GTP. 0.1 μM <sup>32</sup>P-labelled RNA oligo1 and 0.5 μM RNA oligo2 were incubated with C12orf29<sup>WT</sup> and the indicated concentrations of nucleotides in 1x RNA ligation buffer at 37 °C for 1 h in a total volume of 10 μL. The reaction was stopped by adding 150 μL stopping solution and heating at 95 °C for 2 min. 1 μL of samples were resolved by urea-PAGE and analysed by autoradiographic imaging. Enzymatic turnover was quantified by Image Lab. The parameters  $k_{cat}$ ,  $K_M$ , and  $k_{cat}/K_M$  were determined from a non-linear regression fit/Michaelis-Menten curve of the initial rates at each substrate concentration using GraphPad Prism. The following equation was used. Plotted data represent the median value ± SD for three biological replicates.

$$v_0 = \frac{v_{max} * [S]}{K_M + [S]}$$

### **Mutational Effects on RNA Ligation**

0.1  $\mu\text{M}$  5'  $^{32}\text{P}$ -labelled RNA23 were applied in the standard RNA ligation assay with 1.0  $\mu\text{M}$  C12orf29 variants. The readout was processed by Image Lab, Bio-Rad to give signal intensities, which were normalized to that of control experiment (without enzyme). The values represented arithmetic mean  $\pm$  SD from three biological replicates in histogram.

### **Preparation of *C12ORF29* Knockout HEK293 Cell Lines**

The *C12ORF29* knockout cell lines were generated in collaboration with trenzyme GmbH (Konstanz, Germany): gRNA oligonucleotides were designed to target and knock out *C12ORF29*. After successful nucleofection of the gRNA into the cells, single cell cloning by limiting dilution was performed. All resulting clones were picked and analysed resulting in clones that were homozygous for *C12ORF29* knockout. One of the knockout cell lines was chosen for further experiments.

### **Cell Viability Assay of HEK293 Cells Treated with Different Concentrations of Menadione**

The CellTiter-Glo<sup>®</sup> Luminescent Cell Viability Assay (Promega) was used according to the manufacturer's instruction.  $4.0 \times 10^4$  cells per well were seeded one day before the menadione treatment in 90  $\mu\text{L}$  DMEM GlutaMAX<sup>™</sup> medium with 10% FCS in a 96-well plate (Sarstedt). The plate was incubated at 37  $^{\circ}\text{C}$ , 5%  $\text{CO}_2$ , and 100% humidity for 24 h.

1,000x menadione stock solutions were prepared in ethanol and frozen in aliquots. On the day of the treatment, aliquots were thawed and diluted 1/100 in MilliQ<sup>®</sup>  $\text{H}_2\text{O}$ . The cells were treated with 10  $\mu\text{L}$  of different concentrations of menadione in MilliQ<sup>®</sup>  $\text{H}_2\text{O}$ . The plate was incubated at 37  $^{\circ}\text{C}$ , 5%  $\text{CO}_2$ , 100% humidity. After 3 h, the cells were equilibrated to RT (15 min) and 100  $\mu\text{L}$  of CellTiter-Glo<sup>®</sup> reagent was added per well and mixed thoroughly. The plate was incubated for 10 min on a shaker. 100  $\mu\text{L}$  of the solution was transferred to a black 96-well plate and luminescence read out was performed with a plate reader (PerkinElmer Victor3<sup>™</sup> Multilabel Counter 1420).

The luminescence values of the treated cells were compared to the value of the cells of the control treatment, which were treated with 0  $\mu\text{M}$  menadione (equals 100% viability), to give the calculated cell viability.

### **Sequence Information**

Unless otherwise noted, the thrombin-removable N-terminal regions are shaded in grey. The N-terminal His<sub>6</sub>-tag regions are in italic. The thrombin recognition motifs are

underlined. The black arrows indicate the thrombin cleavage site. The starting codon and methionine in the protein coding region are in bold. The mutation sites are in red.

### *C12orf29*<sup>WT</sup>

Amino acid sequence:

MGSSHHHHHH SSGLVPR↓GSH

**M**KRLG**S**VQ**R**K MPCV**F**VTEV**K** EEPSSKREHQ PFKVLATETV SHKALDADIY  
SAIPTEKVDG TCCYVTTYKD QPYLWARLDR KPNKQAEKRF KNFLHSKENP  
KEFFWNVEED FKPAPECWIP AKETEQINGN PVPDENGHIP GWVPVEKNNK  
QYCWSSSVVN YEFEIALVLK HHPDDSGLE ISAVPLSDLL EQTLELIGTN  
INGNPYGLGS KKHPLHLLIP HGA**F**QIRNLP SLKHNDLVSW FEDCKEGKIE  
GIVWHCSDGC LIKVHRHHLG LCWPIPD**T**YM NSRPVIINMN LNKCD**S**AFDI  
KCLFNHFLKI DNQKFVRLKD IIFDV\*

DNA sequence:

ATGGGCAGCAGCCATCATCATCATCACAGCAGCGGCCTGGTGCCGC  
GC↓GGCAGCCATATGAAGCGCCTTGGCAGCGTTCAACGCAAATGCCT  
TGTGTATTCGTCACAGAAGTCAAAGAAGAGCCTAGTAGCAAACGTGAG  
CATCAGCCATTCAAGGTTTTGGCTACTGAGACGGTTTTCCACAAAGCG  
TTGGACGCCGACATTTATTCGGCAATCCCTACGGAAAAAGTAGACGGA  
ACCTGTTGCTACGTAACGACTTACAAAGACCAGCCTTATCTGTGGGCCC  
GTTTAGACCGCAAACCCAATAAGCAGGCGGAGAAACGTTTTAAGAATT  
TCCTTCATTCAAAGAGAAACCCTAAAGAGTTCTTTTGAATGTCGAAG  
AAGATTTAAGCCCGCACCTGAATGTTGGATTCCCGCAAAGAGACTG  
AACAGATTAACGGGAATCCCGTACCGGACGAGAACGGCCATATCCCTG  
GTTGGGTGCCCGTAGAGAAGAACAATAACAATATTGCTGGCACAGCA  
GCGTGGTGA**A**CTACGAATTTGAGATTGCACTTGT**T**TTGAAGCACCACC  
CAGATGATTCCGGCTTGT**T**GGAGATTAGCGCAGTACCGCTTAGTGACCT  
TCTTGAACAGACCTTGGAGCTTATTGGTACAAACATCAACGGAAATCC  
GTACGGTTTAGGCTCTAAGAAACATCCATTGCATCTTTTAATCCCGCAC  
GGTGCCTTCAAATCCGTAACCTTCTCTTAAGCATAATGACTTAGT  
ATCCTGGTTTGAAGATTGCAAGGAGGGGAAAATCGAAGGGATCGTCTG  
GCACTGCAGCGACGGCTGCCTGATTAAAGTCCATCGCCACCATTGGG  
ACTGTGTTGGCCTATCCAGACACGTATATGAATAGCCGCCCGGTTATTA  
TTAACATGAATCTTAATAAGTGTGATAGCGCCTTCGATATCAAATGTCTT  
TTAACCATTTTTTAAAGATCGACAATCAAAGTTTGTGCGCCTTAAAG  
ATATCATTTTTGATGTATAATAA

### *C12orf29*<sup>T55A</sup>

Amino acid sequence:

MGSSHHHHHH SSGLVPR↓GSH

**M**KRLG**S**VQ**R**K MPCV**F**VTEV**K** EEPSSKREHQ PFKVLATETV SHKALDADIY  
SAIP**A**EKVDG TCCYVTTYKD QPYLWARLDR KPNKQAEKRF KNFLHSKENP  
KEFFWNVEED FKPAPECWIP AKETEQINGN PVPDENGHIP GWVPVEKNNK  
QYCWSSSVVN YEFEIALVLK HHPDDSGLE ISAVPLSDLL EQTLELIGTN

INGNPYGLGS KKHPLHLLIP HGAFAQIRNLP SLKHNDLVSF FEDCKEKGIE  
GIVWHCSDGC LIKVHRHHLG LCWPIPDYTM NSRPVIINMN LNKCDSEAFDI  
KCLFNHFLKI DNQKFVRLKD IIFDV\*

DNA sequence:

ATGGGCAGCAGCCATCATCATCATCACAGCAGCGGCCTGGTGCCGC  
GCGGCAGCCATATGAAGCGCCTTGGCAGCGTTCAACGCAAATGCCT  
TGTGTATTCGTACAGAAAGTCAAAGAAGAGCCTAGTAGCAAACGTGAG  
CATCAGCCATTCAAGGTTTTGGCTACTGAGACGGTTTTCCCACAAAGCG  
TTGGACGCCGACATTTATTCGGCAATCCCTGCGGAAAAAGTAGACGGA  
ACCTGTTGCTACGTAACGACTTACAAAGACCAGCCTTATCTGTGGGCCC  
GTTTAGACCGCAAACCCAATAAGCAGGCGGAGAAACGTTTTAAGAATT  
TCCTTCATTCAAAGAGAACCCTAAAGAGTTCTTTTGGAAATGTCGAAG  
AAGATTTAAGCCCGCACCTGAATGTTGGATTCCCGCAAAGAGACTG  
AACAGATTAACGGGAATCCCGTACCGGACGAGAACGGCCATATCCCTG  
GTTGGGTGCCCGTAGAGAAGAACAATAACAATATTGCTGGCACAGCA  
GCGTGGTGAACACTACGAATTTGAGATTGCACTTGTTTTGAAGCACCACC  
CAGATGATTCCGGCTTGTGGAGATTAGCGCAGTACCGCTTAGTGACCT  
TCTTGAACAGACCTTGGAGCTTATTGGTACAAACATCAACGGAAATCC  
GTACGGTTTAGGCTCTAAGAAACATCCATTGCATCTTTTAATCCCGCAC  
GGTGCCTTCAAATCCGTAACCTTCTCTTAAGCATAATGACTTAGT  
ATCCTGGTTTGAAGATTGCAAGGAGGGGAAAATCGAAGGGATCGTCTG  
GCACTGCAGCGACGGCTGCCTGATTAAAGTCCATCGCCACCATTTGGG  
ACTGTGTTGGCCTATCCAGACACGTATATGAATAGCCGCCCGGTTATTA  
TTAACATGAATCTTAATAAGTGTGATAGCGCCTTCGATATCAAATGTCTT  
TTAACCATTTTTTAAAGATCGACAATCAAAGTTTGTGCGCCTTAAAG  
ATATCATTTTTGATGTATAATAA

C12orf29<sup>K57A</sup>

Amino acid sequence:

MGSSHHHHHH SSGLVPRJGSH

**M**KRLGSVQRK MPCVFEVTEVK EEPSSKREHQ PFKVLATETV SHKALDADIY  
SAIPTEAVDG TCCYVTTYKD QPYLWARLDR KPNKQAEKRF KNFLHSKENP  
KEFFWNVEED FKPAPECWIP AKETEQINGN PVPDENGHIP GWVPVEKNNK  
QYCWHSVVN YEFEIALVLK HHPDDSGLLE ISAVPLSDLLE EQTLELIGTN  
INGNPYGLGS KKHPLHLLIP HGAFAQIRNLP SLKHNDLVSF FEDCKEKGIE  
GIVWHCSDGC LIKVHRHHLG LCWPIPDYTM NSRPVIINMN LNKCDSEAFDI  
KCLFNHFLKI DNQKFVRLKD IIFDV\*

DNA sequence:

ATGGGCAGCAGCCATCATCATCATCACAGCAGCGGCCTGGTGCCGC  
 GC↓GGCAGCCATATGAAGCGCCTTGGCAGCGTTCAACGCAAATGCCT  
 TGTGTATTCGTCACAGAAGTCAAAGAAGAGCCTAGTAGCAAACGTGAG  
 CATCAGCCATTCAAGGTTTTGGCTACTGAGACGGTTTCCCACAAAGCG  
 TTGGACGCCGACATTTATTCGGCAATCCCTACGGAA**GCC**GTAGACGGA  
 ACCTGTTGCTACGTAACGACTTACAAAGACCAGCCTTATCTGTGGGCCC  
 GTTTAGACCGCAAACCCAATAAGCAGGCGGAGAAACGTTTTAAGAATT  
 TCCTTCATTCAAAGAGAACCCTAAAGAGTTCTTTTGGAAATGTCGAAG  
 AAGATTTTAAGCCCGCACCTGAATGTTGGATTCCCGCAAAGAGACTG  
 AACAGATTAACGGGAATCCCGTACCGGACGAGAACGGCCATATCCCTG  
 GTTGGGTGCCCGTAGAGAAGAACAATAACAATATTGCTGGCACAGCA  
 GCGTGGTGAACACTACGAATTTGAGATTGCACTTGTTTTGAAGCACCACC  
 CAGATGATTCCGGCTTGTTGGAGATTAGCGCAGTACCGCTTAGTGACCT  
 TCTTGAACAGACCTTGGAGCTTATTGGTACAAACATCAACGGAAATCC  
 GTACGGTTTAGGCTCTAAGAAACATCCATTGCATCTTTTAATCCCGCAC  
 GGTGCCTTCCAAATCCGTAACCTTCTCTTAAGCATAATGACTTAGT  
 ATCCTGGTTTGAAGATTGCAAGGAGGGGAAAATCGAAGGGATCGTCTG  
 GCACTGCAGCGACGGCTGCCTGATTAAGTCCATCGCCACCATTGGG  
 ACTGTGTTGGCCTATCCCAGACACGTATATGAATAGCCGCCCGGTTATTA  
 TTAACATGAATCTTAATAAGTGTGATAGCGCCTTCGATATCAAATGTCTT  
 TTTAACCATTTTTTAAAGATCGACAATCAAAGTTTGTGCGCCTTAAAG  
 ATATCATTTTTGATGTATAATAA

*C12orf29<sup>D59A</sup>*

Amino acid sequence:

MGSSHHHHHH SSGLVPR↓GSH

|               |                |      |         |       |        |       |        |       |        |
|---------------|----------------|------|---------|-------|--------|-------|--------|-------|--------|
| <b>M</b> KRLG | SVQRK          | MPCV | FVTEVK  | EEPSS | KREHQ  | PFKVL | ATETV  | SHKAL | DADIY  |
| SAIP          | TEKVA <b>G</b> | TCCY | VTTYKD  | QPYL  | WARLDR | KPNK  | QAEKRF | KNFL  | HSKENP |
| KEFF          | WNVEED         | FKPA | PECWIP  | AKETE | QINGN  | PVPD  | ENGHIP | GWVP  | VEKNNK |
| QYCW          | HSSVFN         | YEF  | EIALVLK | HHPDD | SGLLE  | ISAV  | PLSDLL | EQTLE | LIGTN  |
| INGN          | PYGLGS         | KKH  | PLHLLIP | HGAF  | QIRNLP | SLKH  | NDLVSW | FEDCK | EGKIE  |
| GIVW          | HCSDCG         | LIK  | VHRHHLG | LCW   | PIPDYM | NSRP  | VIINMN | LNKCD | SAFDI  |
| KCLF          | NHFLKI         | DNQ  | KFVRLKD | IIFDV | *      |       |        |       |        |

DNA sequence:

ATGGGCAGCAGCCATCATCATCATCACAGCAGCGGCCTGGTGCCGC  
 GC↓GGCAGCCATATGAAGCGCCTTGGCAGCGTTCAACGCAAATGCCT  
 TGTGTATTCGTCACAGAAGTCAAAGAAGAGCCTAGTAGCAAACGTGAG  
 CATCAGCCATTCAAGGTTTTGGCTACTGAGACGGTTTCCCACAAAGCG  
 TTGGACGCCGACATTTATTCGGCAATCCCTACGGAAAAAGTA**GCCGGA**

ACCTGTTGCTACGTAACGACTTACAAAGACCAGCCTTATCTGTGGGCCC  
 GTTTAGACCGCAAACCCAATAAGCAGGCGGAGAAACGTTTTAAGAATT  
 TCCTTCATTCAAAGAGAACCCTAAAGAGTTCTTTTGGAAATGTCGAAG  
 AAGATTTTAAGCCCGCACCTGAATGTTGGATTCCCGCAAAGAGACTG  
 AACAGATTAACGGGAATCCCGTACCGGACGAGAACGGCCATATCCCTG  
 GTTGGGTGCCCGTAGAGAAGAACAATAACAATATTGCTGGCACAGCA  
 GCGTGGTGAACACTACGAATTTGAGATTGCACTTGTTTTGAAGCACCACC  
 CAGATGATTCCGGCTTGTTGGAGATTAGCGCAGTACCGCTTAGTGACCT  
 TCTTGAACAGACCTTGGAGCTTATTGGTACAAACATCAACGGAAATCC  
 GTACGGTTTAGGCTCTAAGAAACATCCATTGCATCTTTTAATCCCGCAC  
 GGTGCCTTCAAATCCGTAACCTTCTCTTAAGCATAATGACTTAGT  
 ATCCTGGTTTGAAGATTGCAAGGAGGGGAAAATCGAAGGGATCGTCTG  
 GCACTGCAGCGACGGCTGCCTGATTAAGTCCATCGCCACCATTGGG  
 ACTGTGTTGGCCTATCCCAGACACGTATATGAATAGCCGCCCGGTTATTA  
 TTAACATGAATCTTAATAAGTGTGATAGCGCCTTCGATATCAAATGTCTT  
 TTTAACCATTTTTTAAAGATCGACAATCAAAGTTTGTGCGCCTTAAAG  
 ATATCATTTTTGATGTATAATAA

*C12orf29<sup>D59N</sup>*

Amino acid sequence:

MGSSHHHHHH SSGLVPRIGSH

**M**KRLG**S**VQ**R**K MPCV**F**VTE**V**K EEP**S**SKRE**H**Q PFKVLATETV SHKALDADIY  
 SAIPTEK**V**NG TCCYVTTYKD QPYLWARLDR KPNKQAEKRF KNFLHSKENP  
 KEFFWNVEED FKPAP**E**CWIP AKETE**Q**INGN PVPDENGHIP GWVPVEKNNK  
 QYCWHSSV**V**N YEF**E**I**A**LVLK HHPDD**S**GLLE ISAVPLSDLL EQTLELIGTN  
 INGNPYGLGS KKHPLHLLIP HGAFQIRNLP SLKHNDL**V**SW FEDCK**E**GKIE  
 GIVWHCS**D**GC LIK**V**HRHHLG LCWPIPD**T**YM NSRPVIINMN LNKCD**S**AFDI  
 KCL**F**NHFLKI DNQKFVRLKD IIFDV\*

DNA sequence:

ATGGGCAGCAGCCATCATCATCATCACAGCAGCGGCCTGGTGCCGC  
 GCIGGCAGCCATATGAAGCGCCTTGGCAGCGTTCAACGCAAATGCCT  
 TGTGTATTCGTCACAGAAGTCAAAGAAGAGCCTAGTAGCAAACGTGAG  
 CATCAGCCATTCAAGGTTTTGGCTACTGAGACGGTTTCCCACAAAGCG  
 TTGGACGCCGACATTTATTCGGCAATCCCTACGGAAAAAGTA**AAC**GGGA  
 ACCTGTTGCTACGTAACGACTTACAAAGACCAGCCTTATCTGTGGGCCC  
 GTTTAGACCGCAAACCCAATAAGCAGGCGGAGAAACGTTTTAAGAATT  
 TCCTTCATTCAAAGAGAACCCTAAAGAGTTCTTTTGGAAATGTCGAAG  
 AAGATTTTAAGCCCGCACCTGAATGTTGGATTCCCGCAAAGAGACTG  
 AACAGATTAACGGGAATCCCGTACCGGACGAGAACGGCCATATCCCTG

GTTGGGTGCCCGTAGAGAAGAACAATAACAATATTGCTGGCACAGCA  
 CGGTGGTGAACACTACGAATTTGAGATTGCACTTGTTTTGAAGCACCACC  
 CAGATGATTCCGGCTTGTTGGAGATTAGCGCAGTACCGCTTAGTGACCT  
 TCTTGAACAGACCTTGGAGCTTATTGGTACAAACATCAACGGAAATCC  
 GTACGGTTTAGGCTCTAAGAAACATCCATTGCATCTTTTAATCCCGCAC  
 GGTGCCTTCCAAATCCGTAACCTTCTCTTAAGCATAATGACTTAGT  
 ATCCTGGTTTGAAGATTGCAAGGAGGGGAAAATCGAAGGGATCGTCTG  
 GCACTGCAGCGACGGCTGCCTGATTAAGTCCATCGCCACCATTGGG  
 ACTGTGTTGGCCTATCCAGACACGTATATGAATAGCCGCCCGGTTATTA  
 TTAACATGAATCTTAATAAGTGTGATAGCGCCTTCGATATCAAATGTCTT  
 TTTAACCATTTTTTAAAGATCGACAATCAAAGTTTGTGCGCCTTAAAG  
 ATATCATTTTTTGATGTATAATAA

*C12orf29<sup>R77L</sup>*

Amino acid sequence:

MGSSHHHHHH SSGLVPR↓GSH

**M**KRLGSVQRK MPCVFEVTEVK EEPSSKREHQ PFKVLATETV SHKALDADIY  
 SAIPTEKVDG TCCYVTTYKD QPYLWALLDR KPNKQAEKRF KNFLHSKENP  
 KEFFWNVEED FKPAPECWIP AKETEQINGN PVPDENGHIP GWVPVEKNNK  
 QYCWHSVVN YEFEIALVLK HHPDDSGLE ISAVPLSDLL EQTLELIGTN  
 INGNPYGLGS KKHPLHLLIP HGAFAQIRNLP SLKHNDLVSF FEDCKEGKIE  
 GIVWHCSDGC LIKVHRHHLG LCWPIPDTYM NSRPVIINMN LNKCDSAFDI  
 KCLFNHFLKI DNQKFVRLKD IIFDV\*

DNA sequence:

ATGGGCAGCAGCCATCATCATCATCACAGCAGCGGCCTGGTGCCCGC  
 GC↓GGCAGCCATATGAAGCGCCTTGGCAGCGTTCAACGCAAAATGCCT  
 TGTGTATTTCGTCACAGAAGTCAAAGAAGAGCCTAGTAGCAAACGTGAG  
 CATCAGCCATTCAAGGTTTTGGCTACTGAGACGGTTTCCCACAAAGCG  
 TTGGACGCCGACATTTATTCGGCAATCCCTACGGAAAAAGTAGACGGA  
 ACCTGTTGCTACGTAACGACTTACAAAGACCAGCCTTATCTGTGGGCC  
**TT**TAGACCGCAAACCCAATAAGCAGGCGGAGAAACGTTTTAAGAATT  
 TCCTTCATTCAAAGAGAACCCTAAAGAGTTCTTTTGAATGTCGAAG  
 AAGATTTAAGCCCGCACCTGAATGTTGGATTCCCGCAAAGAGACTG  
 AACAGATTAACGGGAATCCCGTACCGGACGAGAACGGCCATATCCCTG  
 GTTGGGTGCCCGTAGAGAAGAACAATAACAATATTGCTGGCACAGCA  
 CGGTGGTGAACACTACGAATTTGAGATTGCACTTGTTTTGAAGCACCACC  
 CAGATGATTCCGGCTTGTTGGAGATTAGCGCAGTACCGCTTAGTGACCT  
 TCTTGAACAGACCTTGGAGCTTATTGGTACAAACATCAACGGAAATCC  
 GTACGGTTTAGGCTCTAAGAAACATCCATTGCATCTTTTAATCCCGCAC



GGTGCCTTCCAAATCCGTAACCTTACCTTCTCTTAAGCATAATGACTTAGT  
ATCCTGGTTTGAAGATTGCAAGGAGGGGAAAATCGAAGGGATCGTCTG  
GCACTGCAGCGACGGCTGCCTGATTAAAGTCCATCGCCACCATTGGG  
ACTGTGTTGGCCTATCCCAGACACGTATATGAATAGCCGCCCGGTTATTA  
TTAACATGAATCTTAATAAGTGTGATAGCGCCTTCGATATCAAATGTCTT  
TTAACCATTTTTTAAAGATCGACAATCAAAGTTTGTGCGCCTTAAAG  
ATATCATTTTTTGATGTATAATAA

C12orf29<sup>E123D</sup>

Amino acid sequence:

MGSSHHHHHH SSGLVPR↓GSH

**M**KRLGSVQRK MPCV FVTEVK EEPSSKREHQ PFKVLATETV SHKALDADIY  
SAIPTEKVDG TCCYVTTYKD QPYLWARLDR KPNKQAEKRF KNFLHSKENP  
KEFFWNVEED FKPAPECWIP **A**K↓TEQINGN PVPDENGHIP GWVPVEKNNK  
QYCWHSVVN YEFEIALVLK HHPDDSGLE ISAVPLSDLL EQTLELIGTN  
INGNPYGLGS KKHPLHLLIP HGAFQIRNLP SLKHNDLVSF FEDCKEGKIE  
GIVWHCSDGC LIKVHRHHLG LCWPIPDYTM NSRPVIINMN LNKCDSAFDI  
KCLFNHFLKI DNQKFVRLKD IIFDV\*

DNA sequence:

ATGGGCAGCAGCCATCATCATCATCACAGCAGCGGCCTGGTGCCGC  
GC↓GGCAGCCATATGAAGCGCCTTGGCAGCGTTCAACGCAAATGCCT  
TGTGTATTCGTACAGAAAGTCAAAGAAGAGCCTAGTAGCAAACGTGAG  
CATCAGCCATTCAAGGTTTTGGCTACTGAGACGGTTTCCCACAAAGCG  
TTGGACGCCGACATTTATTCGGCAATCCCTACGGAAAAAGTAGACGGA  
ACCTGTTGCTACGTAACGACTTACAAAGACCAGCCTTATCTGTGGGCCC  
GTTTAGACCGCAAACCCAATAAGCAGGCGGAGAAACGTTTTAAGAATT  
TCCTTCATTCAAAGAGAACCCTAAAGAGTTCTTTTGAATGTCTGAAG  
AAGATTTAAGCCCGCACCTGAATGTTGGATTCCCGCAAAA**GAC**ACTG  
AACAGATTAACGGGAATCCCGTACCGGACGAGAACGGCCATATCCCTG  
GTTGGGTGCCCGTAGAGAAGAACAATAACAATATTGCTGGCACAGCA  
GCGTGGTGAACACTACGAATTTGAGATTGCACTTGTTTTGAAGCACCACC  
CAGATGATTCCGGCTTGTTGGAGATTAGCGCAGTACCGCTTAGTGACCT  
TCTTGAACAGACCTTGGAGCTTATTGGTACAAACATCAACGGAAATCC  
GTACGGTTTtaggctctaagaaacatccattgcatctTTTAATCCCGCAC  
GGTGCCTTCCAAATCCGTAACCTTCTCTTAAGCATAATGACTTAGT  
ATCCTGGTTTGAAGATTGCAAGGAGGGGAAAATCGAAGGGATCGTCTG  
GCACTGCAGCGACGGCTGCCTGATTAAAGTCCATCGCCACCATTGGG  
ACTGTGTTGGCCTATCCCAGACACGTATATGAATAGCCGCCCGGTTATTA  
TTAACATGAATCTTAATAAGTGTGATAGCGCCTTCGATATCAAATGTCTT

TTTAACCATTTTTTAAAGATCGACAATCAAAGTTTGTGCGCCTTAAAG  
ATATCATTTTTTGATGTATAATAA

C12orf29<sup>E123Q</sup>

Amino acid sequence:

MGSSHHHHHH SSGLVPRJGSH

**M**KRLGSVQRK MPCV FVTEVK EEPSSKREHQ PFKVLATETV SHKALDADIY  
SAIPTEKVDG TCCYVTTYKD QPYLWARLDR KPNKQAEKRF KNFLHSKENP  
KEFFWNVEED FKPAPECWIP AKQTEQINGN PVPDENGHIP GWVPVEKNNK  
QYCWHSVVN YEFEIALVLK HHPDDSGLE ISAVPLSDLL EQTLELIGTN  
INGNPYGLGS KKHPLHLLIP HGA FQIRNLP SLKHNDLVSW FEDCKEGKIE  
GIVWHCSDGC LIKVHRHHLG LCWPIPD TYM NSRPVIINMN LNKCD SAFDI  
KCLFNHFLKI DNQKFVRLKD IIFDV\*

DNA sequence:

ATGGGCAGCAGCCATCATCATCATCACAGCAGCGGCCTGGTGCCGC  
GCGGCAGCCATATGAAGCGCCTTGGCAGCGTTCAACGCAAATGCCT  
TGTGTATTCGTCACAGAAGTCAAAGAAGAGCCTAGTAGCAAACGTGAG  
CATCAGCCATTCAAGGTTTTGGCTACTGAGACGGTTTCCCACAAAGCG  
TTGGACGCCGACATTTATTCGGCAATCCCTACGGAAAAAGTAGACGGA  
ACCTGTTGCTACGTAACGACTTACAAAGACCAGCCTTATCTGTGGGCCC  
GTTTAGACCGCAAACCCAATAAGCAGGCGGAGAAACGTTTTAAGAATT  
TCCTTCATTCAAAGAGAACCCTAAAGAGTTCTTTTGAATGTCTGAAG  
AAGATTTAAGCCCGCACCTGAATGTTGGATTCCCGCAAAA**CAG**ACTG  
AACAGATTAACGGGAATCCCGTACCGGACGAGAACGGCCATATCCCTG  
GTTGGGTGCCCGTAGAGAAGAACAATAACAATATTGCTGGCACAGCA  
GCGTGGTGAAC TACGAATTTGAGATTGCACTTGTTTTGAAGCACCACC  
CAGATGATTCCGGCTTGTTGGAGATTAGCGCAGTACCGCTTAGTGACCT  
TCTTGAACAGACCTTGGAGCTTATTGGTACAAACATCAACGGAAATCC  
GTACGGTTTAGGCTCTAAGAAACATCCATTGCATCTTTTAATCCCGCAC  
GGTGCCTTCAAATCCGTAACCTTCTCTTAAGCATAATGACTTAGT  
ATCCTGGTTTGAAGATTGCAAGGAGGGGAAAATCGAAGGGATCGTCTG  
GCACTGCAGCGACGGCTGCCTGATTAAAGTCCATCGCCACCATTGGG  
ACTGTGTTGGCCTATCCCAGACACGTATATGAATAGCCGCCCGGTTATTA  
TTAACATGAATCTTAATAAGTGTGATAGCGCCTTCGATATCAAATGTCTT  
TTTAACCATTTTTTAAAGATCGACAATCAAAGTTTGTGCGCCTTAAAG  
ATATCATTTTTTGATGTATAATAA

C12orf29<sup>E250A</sup>

Amino acid sequence:

MGSSHHHHHH SSGLVPR↓GSH

**M**KRLG**S**VQ**R**K MPCV**F**VTE**V**K EEP**S**SK**R**EHQ PFKVLATETV SHKALDADIY  
SAIP**T**E**K**VDG TCCY**V**TTY**K**D QPYLWARLDR KPN**K**QAE**K**RF KN**F**L**H**SKENP  
KE**F**FW**N**VEED FK**P**AP**E**CWIP AK**E**TE**Q**INGN PVPDENGHIP GWVPVEK**N**NK  
QY**C**WH**S**SVVN Y**E**FE**I**AL**V**LK HHP**D**DS**G**LLE ISAVPLSDLL EQ**T**LE**L**IG**T**N  
ING**N**PY**G**LGS K**K**H**P**L**H**LLIP H**G**AF**Q**IR**N**LP SL**K**H**N**DL**V**SW FED**C**KE**G**K**I****A**  
GIV**W**HCSDGC LI**K**V**R**HLG LC**W**PI**P**DT**Y**M NS**R**P**V**I**I**N**M**N L**N**K**C**DS**A**FD**I**  
K**C**LE**N**H**F**L**K**I DN**Q**K**F**V**R**L**K**D I**I**FD**V**\*

DNA sequence:

**ATGGGCAGCAGCCATCATCATCATCACAGCAGCGGCCTGGTGCCGC**  
**GC**↓**GGCAGCCATATGAAGCGCCTTGGCAGCGTTCAACGCAAATGCCT**  
TGTGTATTCGTCACAGAAGTCAAAGAAGAGCCTAGTAGCAAACGTGAG  
CATCAGCCATTCAAGGTTTTGGCTACTGAGACGGTTTCCCACAAAGCG  
TTGGACGCCGACATTTATTCGGCAATCCCTACGGAAAAAGTAGACGGA  
ACCTGTTGCTACGTAACGACTTACAAAGACCAGCCTTATCTGTGGGCCC  
GTTTAGACCGCAAACCCAATAAGCAGGCGGAGAAACGTTTTAAGAATT  
TCCTTCATTCAAAGAGAACCCTAAAGAGTTCTTTTGGAAATGTCGAAG  
AAGATTTTAAGCCCGCACCTGAATGTTGGATTCCCGCAAAGAGACTG  
AACAGATTAACGGGAATCCCGTACCGGACGAGAACGGCCATATCCCTG  
GTTGGGTGCCCGTAGAGAAGAACAATAACAATATTGCTGGCACAGCA  
GCGTGGTGA**A**CTACGAATTTGAGATTGCACTTGT**T**TTGAAGCACCACC  
CAGATGATTCCGGCTTGT**T**GGAGATTAGCGCAGTACCGCTTAGTGACCT  
TCTTGAACAGACCTTGGAGCTTATTGGTACAAACATCAACGGAAATCC  
GTACGGTTTAGGCTCTAAGAAACATCCATTGCATCTTTTAATCCCGCAC  
GGTGCCTTCAAATCCGTAACCTTCTCTTAAGCATAATGACTTAGT  
ATCCTGGTTTGAAGATTGCAAGGAGGGGAAAAT**CGC**AGGGATCGTCTG  
GCACTGCAGCGACGGCTGCCTGATTAAAGTCCATCGCCACCATTGGG  
ACTGTGTTGGCCTATCCCAGACACGTATATGAATAGCCGCCCGGTTATTA  
TTAACATGAATCTTAATAAGTGTGATAGCGCCTTCGATATCAAATGTCTT  
TTTAACCATTTTTTAAAGATCGACAATCAAAGTTTGTGCGCCTTAAAG  
ATATCATTTTTTGATGTATAATAA

*C12orf29<sup>E250Q</sup>*

Amino acid sequence:

MGSSHHHHHH SSGLVPR↓GSH

**M**KRLG**S**VQ**R**K MPCV**F**VTE**V**K EEP**S**SK**R**EHQ PFKVLATETV SHKALDADIY  
SAIP**T**E**K**VDG TCCY**V**TTY**K**D QPYLWARLDR KPN**K**QAE**K**RF KN**F**L**H**SKENP  
KE**F**FW**N**VEED FK**P**AP**E**CWIP AK**E**TE**Q**INGN PVPDENGHIP GWVPVEK**N**NK  
QY**C**WH**S**SVVN Y**E**FE**I**AL**V**LK HHP**D**DS**G**LLE ISAVPLSDLL EQ**T**LE**L**IG**T**N

INGNPYGLGS KKHPLHLLIP HGAFAQIRNLP SLKHNDLVSF FEDCKEKGKIQ  
GIVWHCSDGC LIKVHRHHLG LCWPIPDTYM NSRPVIINMN LNKCDSEAFDI  
KCLFNHFLKI DNQKFVRLKD IIFDV\*

DNA sequence:

ATGGGCAGCAGCCATCATCATCATCACAGCAGCGGCCTGGTGCCGC  
GCGGCAGCCATATGAAGCGCCTTGGCAGCGTTCAACGCAAATGCCT  
TGTGTATTCGTCACAGAAGTCAAAGAAGAGCCTAGTAGCAAACGTGAG  
CATCAGCCATTCAAGGTTTTGGCTACTGAGACGGTTTTCCACAAAGCG  
TTGGACGCCGACATTTATTCGGCAATCCCTACGGAAAAAGTAGACGGA  
ACCTGTTGCTACGTAACGACTTACAAAGACCAGCCTTATCTGTGGGCCC  
GTTTAGACCGCAAACCCAATAAGCAGGCGGAGAAACGTTTTAAGAATT  
TCCTTCATTCAAAGAGAACCTAAAGAGTTCTTTTGAATGTCGAAG  
AAGATTTAAGCCCGCACCTGAATGTTGGATTCCCGCAAAGAGACTG  
AACAGATTAACGGGAATCCCGTACCGGACGAGAACGGCCATATCCCTG  
GTTGGGTGCCCGTAGAGAAGAACAATAAACAATATTGCTGGCACAGCA  
GCGTGGTGAACACTACGAATTTGAGATTGCACTTGTTTTGAAGCACCACC  
CAGATGATTCCGGCTTGTTGGAGATTAGCGCAGTACCGCTTAGTGACCT  
TCTTGAACAGACCTTGGAGCTTATTGGTACAAACATCAACGGAAATCC  
GTACGGTTTAGGCTCTAAGAAACATCCATTGCATCTTTAATCCCGCAC  
GGTGCCTTCCAAATCCGTAACCTTCTCTTAAGCATAATGACTTAGT  
ATCCTGGTTTGAAGATTGCAAGGAGGGGAAAATC**CA**AGGGATCGTCTG  
GCACTGCAGCGACGGCTGCCTGATTAAAGTCCATCGCCACCATTTGGG  
ACTGTGTTGGCCTATCCCAGACACGTATATGAATAGCCGCCCGGTTATTA  
TTAACATGAATCTTAATAAGTGTGATAGCGCCTTCGATATCAAATGTCTT  
TTTAACCATTTTTTAAAGATCGACAATCAAAGTTTGTGCGCCTTAAAG  
ATATCATTTTTGATGTATAATAA

C12orf29<sup>K263N</sup>

Amino acid sequence:

MGSSHHHHHH SSGLVPR↓GSH

**M**KRLGSVQRK MPCVFEVTEVK EEPSSKREHQ PFKVLATETV SHKALDADIY  
SAIPTEKVDG TCCYVTTYKD QPYLWARLDR KPNKQAEKRF KNFLHSEKNEP  
KEFFWNVEED FKPAPECWIP AKETEQINGN PVPDENGHIP GWVPVEKNNK  
QYCWHSVVVN YEFEIALVLK HHPDDSGLLE ISAVPLSDLL EQTLELIGTN  
INGNPYGLGS KKHPLHLLIP HGAFAQIRNLP SLKHNDLVSF FEDCKEKGKIE  
GIVWHCSDGC LI**N**VHRHHLG LCWPIPDTYM NSRPVIINMN LNKCDSEAFDI  
KCLFNHFLKI DNQKFVRLKD IIFDV\*

DNA sequence:

ATGGGCAGCAGCCATCATCATCATCACAGCAGCGGCCTGGTGCCGC  
 GC↓GGCAGCCATATGAAGCGCCTTGGCAGCGTTCAACGCAAATGCCT  
 TGTGTATTTCGTCACAGAAGTCAAAGAAGAGCCTAGTAGCAAACGTGAG  
 CATCAGCCATTCAAGGTTTTGGCTACTGAGACGGTTTCCCACAAAGCG  
 TTGGACGCCGACATTTATTCGGCAATCCCTACGGAAAAAGTAGACGGA  
 ACCTGTTGCTACGTAACGACTTACAAAGACCAGCCTTATCTGTGGGCCC  
 GTTTAGACCGCAAACCCAATAAGCAGGCGGAGAAACGTTTTAAGAATT  
 TCCTTCATTCAAAGAGAACCCTAAAGAGTTCTTTTGGAAATGTCGAAG  
 AAGATTTTAAGCCCGCACCTGAATGTTGGATTCCCGCAAAGAGACTG  
 AACAGATTAACGGGAATCCCGTACCGGACGAGAACGGCCATATCCCTG  
 GTTGGGTGCCCGTAGAGAAGAACAATAACAATATTGCTGGCACAGCA  
 GCGTGGTGAACACTACGAATTTGAGATTGCACTTGTTTTGAAGCACCACC  
 CAGATGATTCCGGCTTGTTGGAGATTAGCGCAGTACCGCTTAGTGACCT  
 TCTTGAACAGACCTTGGAGCTTATTGGTACAAACATCAACGGAAATCC  
 GTACGGTTTAGGCTCTAAGAAACATCCATTGCATCTTTTAATCCCGCAC  
 GGTGCCTTCCAAATCCGTAACCTTCTCTTAAGCATAATGACTTAGT  
 ATCCTGGTTTGAAGATTGCAAGGAGGGGAAAATCGAAGGGATCGTCTG  
 GCACTGCAGCGACGGCTGCCTGATT**AAT**GTCCATCGCCACCATTGGG  
 ACTGTGTTGGCCTATCCCAGACACGTATATGAATAGCCGCCCGGTTATTA  
 TTAACATGAATCTTAATAAGTGTGATAGCGCCTTCGATATCAAATGTCTT  
 TTTAACCATTTTTTAAAGATCGACAATCAAAGTTTGTGCGCCTTAAAG  
 ATATCATTTTTTGATGTATAATAA

*AtRNL-CPD*

Amino acid sequence:

MGSSHHHHH SSGLVPR↓GSH

|                    |            |            |            |            |
|--------------------|------------|------------|------------|------------|
| <b>M</b> QGVTPATPE | PAVKEAVQKD | EGLIVFFPGI | PGSAKSALCK | ELLNAPGGFG |
| DDRPVHTLMG         | DLVKGKYWPK | VADERRKKPQ | SIMLADKNAP | NEDVWRQIED |
| MCRRTRASAV         | PIVADSEGTD | TNPYSLDALA | VFMFRVLQRV | NHPGKLDKES |
| SNAGYVLLMF         | YHLYEGKNRN | EFESELIERF | GSLIKMPLLK | SDRTPLPDPV |
| KSVLEEGIDL         | FNLHSRRHGR | LESTKGTYAA | EWTKWEKQLR | DTLVANSEYL |
| SSIQVPFESM         | VHQVREELKT | IAKGDKPPS  | SEKRKHGSIV | FAAINLPATQ |
| VHSLLEKLAA         | ANPTMRSFLE | GKKKSIQEKL | ERSHVTLAHK | RSHGVATVAS |
| YSQHLNREVP         | VELTELIYND | KMAALTAHVG | SVDGETVVS  | NEWPHVTLWT |
| AEGVTAKEAN         | TLPQLYLEGK | ASRLVIDPPV | SISGPLEFF* |            |

DNA sequence:

ATGGGCAGCAGCCATCATCATCATCACAGCAGCGGCCTGGTGCCGC  
 GC↓GGCAGCCATATGCAGGGTGTTACTCCTGCTACGCCTGAACCTGCT  
 GTAAAAGAGGCTGTTTCAGAAAGATGAAGGTCTGATTGTGTTCTTCCCG

GGTATTCCGGGCTCCGCTAAGAGCGCTCTGTGTAAAGAACTGCTGAAC  
GCACCGGGCGGTTTTGGTGATGACCGTCCGGTTCACACCCTGATGGGC  
GACCTGGTGAAAGGTAAATACTGGCCTAAAGTTGCGGACGAGCGCCGC  
AAGAAACCTCAGAGCATTATGCTGGCTGATAAAAACGCTCCTAACGAA  
GATGTTTGGCGCCAGATTGAAGACATGTGTTCGTACCCGCGCATCTG  
CAGTGCCGATTGTCGCGGATTCCGAAGGCACTGATACCAACCCGTA  
CCCTGGATGCGCTGGCTGTTTTTCATGTTCCGCGTGCTGCAGCGTGTTAA  
CCACCCAGGTAAACTGGACAAAGAAAGCTCCAACGCAGGTTATGTCCT  
GCTGATGTTCTATCACCTGTATGAAGGTAAAAACCGTAACGAGTTCGAG  
TCTGAACTGATCGAACGTTTTGGTTCCCTGATCAAAATGCCTCTGCTGA  
AATCTGATCGTACTCCTCTGCCGGACCCAGTTAAATCTGTTCTGGAAGA  
AGGCATTGACCTGTTAATCTGCATAGCCGTCGCCACGGTCGTCTGGAA  
TCTACCAAGGGCACTTACGCCGCGGAATGGACTAAGTGGGAGAAGCA  
GCTGCGTGACACCCTGGTTGCTAACAGCGAATACCTGTCCTCCATCCAG  
GTACCTTTCGAGTCCATGGTGCATCAGGTTTCGCGAAGAACTGAAAACC  
ATCGCCAAAGGCGACTACAAACCGCCATCTTCCGAAAAACGCAAACAT  
GGCAGCATTGTTTTTTCGCGGCTATTAACCTGCCTGCCACTCAGGTTCACT  
CCCTGCTGGAAAAACTGGCAGCGGCGAACCCGACCATGCGTTCTTTCC  
TGGAAGGTAAAAAGAAATCTATCCAGGAAAAACTGGAACGTAGCCAC  
GTGACGCTGGCGCACAAACGTTCCACGGTGTGGCCACTGTGGCTTCC  
TACTCTCAGCACCTGAACCGCGAAGTGCCAGTAGAACTGACCGAACTG  
ATCTACAACGATAAAAATGGCCGCGCTGACTGCTCACGTTGGTTCCGTTG  
ACGGTGAAACTGTCGTGAGCAAAAACGAATGGCCTCACGTCACCCTGT  
GGACCGCGGAAGGTGTTACCGCGAAAGAAGCGAACACCCTGCCGCAG  
CTGTACCTGGAAGGTAAGGCTTCTCGTCTGGTAATCGACCCACCAGTCT  
CTATCTCCGGTCCGCTGGAATTCTTCTAATAA

ANGEL2-AN

Amino acid sequence:

MGSSHHHHH SSSLVPR↓GSH

|                    |            |             |            |            |           |
|--------------------|------------|-------------|------------|------------|-----------|
| <b>M</b> EPSSKRRKH | QGV        | IKRNWEY     | ICSHDKEKTK | ILGDKNVDPK | CEDSENKFD |
| SVMSYNILSQ         | DLLEDNSHLY | RHCRRPVLHW  | SFRFPNILKE | IKHFDADVLC |           |
| LQEVQEDHYG         | AEIRPSLESL | GYHCEYKMRT  | GRKPDGCAIC | FKHSKFSLLS |           |
| VNPVEFFRPD         | ISLLDRDNVG | LVLLLQPKIP  | YAACPAICVA | NTHLLYNPRR |           |
| GDIKLTQLAM         | LLAEISSVAH | QKDGSEFCPIV | MCGDFNSVPG | SPLYSFIEG  |           |
| KLNYEGLPIG         | KVSGQEQRSS | GQRILSIPIW  | PPNLGISQNC | VYEVQQVPKV |           |
| EKTDSDLTQT         | QLKQTEVLVT | AEKLSSNLQH  | HFSLSVYSH  | YFPDTGIPEV |           |
| TTCHSRSAIT         | VDYIFYSAEK | EDVAGHPGAE  | VALVGGLKLL | ARLSLLTEQD |           |
| LWTVNGLPNE         | NNSSDHLPLL | AKFRLEL*    |            |            |           |

DNA sequence:

ATGGGCAGCAGCCATCATCATCATCACAGCAGCGGCCTGGTGCCGC  
GCGGCAGCCATATGGAACCGAGCAGCAAACGTCGTAAACATCAGGGT  
GTTATTAAACGCAACTGGGAATATATCTGCAGCCACGATAAAGAGAAA  
ACCAAAATTCTGGGCGATAAAAACGTTGATCCGAAATGTGAAGATAGC  
GAGAACAAATTTGATTTTAGCGTGATGAGCTACAACATCCTGAGCCAG  
GATCTGCTGGAAGATAATAGCCATCTGTATCGTCATTGTCGTCGTCCGGT  
TCTGCATTGGAGCTTTCGTTTTCCGAACATTCTGAAAGAAATCAAACAC  
TTCGATGCCGATGTTCTGTGTCTGCAAGAAGTTCAAGAGGATCATTATG  
GTGCAGAAATTCGTCCGAGCCTGGAAAGCCTGGGTTATCATTGTGAGT  
ATAAAATGCGTACCGGTCGTAAACCGGATGGTTGTGCAATTTGTTTTAA  
ACACAGCAAATTTAGCCTGCTGAGCGTTAATCCGGTTGAATTTTTCCGT  
CCGGATATTAGTCTGCTGGATCGTGATAATGTTGGTCTGGTTCTGCTGCT  
GCAGCCGAAAATTCCGTATGCAGCATGTCCGGCAATTTGTGTTGCAAAT  
ACCCATCTGCTGTATAATCCGCGTCGTGGTGATATTAAACTGACCCAGC  
TGGCAATGCTGCTGGCAGAAATTAGCAGCGTTGCACATCAGAAAGATG  
GTAGCTTTTGTCCGATTGTTATGTGCGGTGATTTTAACAGCGTTCCGGG  
TAGTCCGCTGTATAGCTTTATCAAAGAAGGCAAACCTGAATTACGAAGGT  
CTGCCGATTGGTAAAGTTAGCGGTCAAGAACAGAGCAGCCGTGGTCAG  
CGTATTCTGAGCATTCCGATTTGGCCTCCGAATCTGGGTATTAGCCAGA  
ATTGTGTTTATGAAGTTCAGCAGGTTCCGAAAGTTGAGAAAACCGATA  
GCGATCTGACCCAGACACAGCTGAAACAGACCGAAGTTCTGGTTACCG  
CAGAAAAACTGAGCAGCAATCTGCAGCATCATTTTAGCCTGAGCAGCG  
TTTATAGCCATTATTTTCCGGATACCGGCATTCCGGAAGTTACCACCTGT  
CATAGCCGTAGCGCAATTACCGTTGATTATATCTTTTACAGCGCAGAGA  
AAGAAGATGTTGCAGGTCATCCGGGTGCCGAAGTTGCACTGGTTGGTG  
GTCTGAAACTGCTGGCACGTCTGAGTCTGCTGACCGAACAGGACCTGT  
GGACCGTTAATGGCCTGCCGAATGAAAATAACAGCAGCGATCATCTGC  
CGCTGCTGGCCAAATTTTCGTCTGGAACCTGTAATAA

## Supplementary References

1. Goujon, M. et al. A new bioinformatics analysis tools framework at EMBL-EBI. *Nucleic Acids Res.* **38**, W695–W699 (2010).
2. Waterhouse, A.M., Procter, J.B., Martin, D.M.A, Clamp, M. & Barton, G. J. Jalview version 2—a multiple sequence alignment editor and analysis workbench. *Bioinformatics* **25**, 1189–1191 (2009).
3. Larsson, J. & Gustafsson, P. A case study in fitting area-proportional Euler diagrams with ellipses using eulerr. *SetVR@ Diagrams* 84–91 (2018).
4. Pei, J., Kim, B.-H. & Grishin, N. V. PROMALS3D: a tool for multiple protein sequence and structure alignments. *Nucleic Acids Res.* **36**, 2295–2300 (2008).
5. Broncel, M. et al. Multifunctional reagents for quantitative proteome-wide analysis of protein modification in human cells and dynamic profiling of protein lipidation during vertebrate development. *Angew. Chem. Int. Ed.* **54**, 5948–5951 (2015).
6. Wang, Y., Rösner, D., Grzywa, M. & Marx, A. Chain terminating and clickable NAD<sup>+</sup> analogues for labeling target proteins of ADP-ribosyltransferases. *Angew. Chem. Int. Ed.* **53**, 8159-8162 (2014).
7. Hofer, A. et al. A modular synthesis of modified phosphoanhydrides. *Chem. Eur. J.* **21**, 10116–10122 (2015).
8. Chen, X. et al. Site-selective azide incorporation into endogenous RNase A via a “chemistry” approach. *Org. Biomol. Chem.* **11**, 353–361 (2013).
9. Yang, D., Gao, Q., Xue, J., Deng, Z. & Lee, O. Y. Polycyclic epoxides and compositions thereof with anti-cancer activities. WO2016/181312 (2016).
10. Chandrika, N. T., Green, K. D., Houghton, J. L. & Garneau-Tsodikova, S. Synthesis and biological activity of mono- and di-*N*-acylated aminoglycosides *ACS Med. Chem. Lett.* **6**, 1134–1139 (2015).
11. Höpfner, D. et al. Monoclonal anti-AMP antibodies are sensitive and valuable tools for detecting patterns of AMPylation. *iScience* **23**, 101800 (2020).
